# Supplementary material for: Attitudes and perceptions of health professionals towards management of hypothyroidism in general practice: a qualitative interview study
Source: PubMed Central journal article supplement — BMJ Open. 2018 Feb 21;8(2):e019970. doi: 10.1136/bmjopen-2017-019970 (PMC5855452; doi:10.1136/bmjopen-2017-019970), 2018-02-21
Supplement: bmjopen-2017-019970.draft_revisions.pdf [file bmjopen-2017-019970.draft_revisions.pdf]

# BMJ Open

BMJ Open is committed to open peer review. As part of this commitment we make the peer review history of every article we publish publicly available.

When an article is published we post the peer reviewers' comments and the authors' responses online. We also post the versions of the paper that were used during peer review. These are the versions that the peer review comments apply to.

The versions of the paper that follow are the versions that were submitted during the peer review process. They are not the versions of record or the final published versions. They should not be cited or distributed as the published version of this manuscript.

BMJ Open is an open access journal and the full, final, typeset and author-corrected version of record of the manuscript is available on our site with no access controls, subscription charges or pay-per-view fees (<http://bmjopen.bmj.com>).

If you have any questions on BMJ Open's open peer review process please email [editorial.bmjopen@bmj.com](mailto:editorial.bmjopen@bmj.com)

# BMJ Open

## Attitudes and perceptions of health professionals towards management of hypothyroidism in general practice: a qualitative interview study

|                                 |                                                                                                                                                                                                                                                                                                                                                                                                                                                                                                                                                                                                                                                                                                                                           |
|---------------------------------|-------------------------------------------------------------------------------------------------------------------------------------------------------------------------------------------------------------------------------------------------------------------------------------------------------------------------------------------------------------------------------------------------------------------------------------------------------------------------------------------------------------------------------------------------------------------------------------------------------------------------------------------------------------------------------------------------------------------------------------------|
| Journal:                        | <i>BMJ Open</i>                                                                                                                                                                                                                                                                                                                                                                                                                                                                                                                                                                                                                                                                                                                           |
| Manuscript ID                   | bmjopen-2017-019970                                                                                                                                                                                                                                                                                                                                                                                                                                                                                                                                                                                                                                                                                                                       |
| Article Type:                   | Research                                                                                                                                                                                                                                                                                                                                                                                                                                                                                                                                                                                                                                                                                                                                  |
| Date Submitted by the Author:   | 05-Oct-2017                                                                                                                                                                                                                                                                                                                                                                                                                                                                                                                                                                                                                                                                                                                               |
| Complete List of Authors:       | Dew, Rosie; University of Sunderland, Faculty of Health Sciences and Wellbeing<br>King, Kathryn; University of Sunderland, Faculty of Health Sciences and Wellbeing<br>Okosieme, Onyebuchi; Prince Charles Hospital<br>Pearce, Simon; Newcastle University, Institute of Genetic Medicine<br>Donovan, Gemma; University of Sunderland, Faculty of Health Sciences and Wellbeing<br>Taylor, Peter ; Cardiff University, School of Medicine<br>Hickey, Janis; British Thyroid Foundation<br>Dayan, Colin; Cardiff University, School of Medicine<br>Leese, Graham; University of Dundee, School of Medicine<br>Razvi, Salman; Queen Elizabeth Hospital<br>Wilkes, Scott; University of Sunderland, Faculty of Health Sciences and Wellbeing |
| <b>Primary Subject Heading</b>: | Diabetes and endocrinology                                                                                                                                                                                                                                                                                                                                                                                                                                                                                                                                                                                                                                                                                                                |
| Secondary Subject Heading:      | General practice / Family practice, Qualitative research                                                                                                                                                                                                                                                                                                                                                                                                                                                                                                                                                                                                                                                                                  |
| Keywords:                       | General practice, levothyroxine, hypothyroidism, TSH, professionals, behaviour                                                                                                                                                                                                                                                                                                                                                                                                                                                                                                                                                                                                                                                            |
|                                 |                                                                                                                                                                                                                                                                                                                                                                                                                                                                                                                                                                                                                                                                                                                                           |

SCHOLARONE™  
Manuscripts

## Attitudes and perceptions of health professionals towards management of hypothyroidism in general practice: a qualitative interview study

### Authors

Rosie Dew<sup>1</sup>, Kathryn King<sup>1</sup>, Onyebuchi E Okosieme<sup>2</sup>, Simon Pearce<sup>3</sup>, Gemma Donovan<sup>1</sup>, Peter Taylor<sup>4</sup>, Janis Hickey<sup>5</sup>, Colin Dayan<sup>4</sup>, Graham Leese<sup>6</sup>, Salman Razvi<sup>7</sup>, Scott Wilkes<sup>1</sup>,

### Address for correspondence

Professor Scott Wilkes, Faculty of Health Sciences and Wellbeing, Sciences Complex, City Campus, Chester Road, University of Sunderland, SR1 3SD. Tel: 0191 515 2186 Fax: N/A  
Email: [Scott.wilkes@sunderland.ac.uk](mailto:Scott.wilkes@sunderland.ac.uk)

### Author affiliations

<sup>1</sup>Faculty of Health Sciences and Wellbeing, University of Sunderland, Sunderland, UK

<sup>2</sup>Prince Charles Hospital, Cardiff, UK

<sup>3</sup>Institute of Genetic Medicine, Newcastle University, Newcastle, UK

<sup>4</sup>Cardiff University School of Medicine, Cardiff University, Cardiff, UK

<sup>5</sup>British Thyroid Foundation, Harrogate, UK

<sup>6</sup>School of Medicine, University of Dundee, Dundee, UK

<sup>7</sup>Queen Elizabeth Hospital, Gateshead, UK

### Keywords

General practice, levothyroxine, hypothyroidism, TSH, professionals, behaviour

**Word count (including quotes)** 5073

### ABSTRACT

#### *Objective*

To explore the attitudes and perceptions of health professionals towards management of hypothyroidism that contributes to the sub-optimal treatment of hypothyroidism in general practice.

#### *Design*

An in-depth interview study using semi-structured interviews.

#### *Participants*

16 participants were interviewed comprising nine general practitioners, four pharmacists, two practice nurses and one nurse practitioner

#### *Setting*

Primary Care in Northumberland, Tyne and Wear, Stockton-on-Tees and North Cumbria, UK.

#### *Method*

A grounded theory approach was used to generate themes from the interviews, which were underpinned by The Theory of Planned Behaviour to give explanation to the data.

#### *Results*

1  
2  
3 Although professionals felt that hypothyroidism was an easy condition to manage,  
4 prescribers generally admitted inadequate knowledge of medication interactions and  
5 levothyroxine pharmacokinetics. Pharmacists felt limited in the advice that they could  
6 provide to patients due to lack of access to patient records. Most prescribers followed local  
7 guidelines, and relied on blood tests over clinical symptoms to adjust levothyroxine dose.  
8 The information exchanged between professional and patient was usually restricted by time  
9 constraints and often centred on symptoms with limited time spent on patient education.  
10 Professionals felt that poor levothyroxine adherence was the main reason behind sub-  
11 optimal treatment, although other factors such as co-morbidity and concomitant medication  
12 were mentioned. Enablers perceived by professionals to improve the management of  
13 hypothyroidism included continuity of care, reminders for blood tests, system alerts for  
14 interfering medications and prescription renewal, and accessible blood tests and  
15 levothyroxine prescriptions for patients.  
16

### 17 *Conclusion*

18  
19 There is a significant professional behavioural component to the management of  
20 hypothyroidism. Addressing the differences in patient and professional knowledge and  
21 perceptions may help to reduce the barriers to optimal treatment, while continuity of care  
22 and the increased involvement of pharmacists and practice nurses would help to further  
23 promote optimal thyroid replacement.  
24  
25

### 26 **Strengths and Limitations of this study**

- 27 • Sub-optimal treatment of hypothyroidism in general practice is common and the  
28 behavioural approaches to treatment by professionals involved in the management  
29 of patients with hypothyroidism warrants exploring.
- 30 • A known potential limitation of qualitative research is the influence the researchers  
31 may have had in the process of data gathering and analysis, however, the researcher  
32 who conducted the interviews did not have medical training or prior medical  
33 assumptions, had not met the participants prior to the interviews, or discussed the  
34 research with them.
- 35 • The confidential in-depth discussions with health professionals in this study allowed  
36 for a rich data of experiences, personal thoughts, and perceptions of the  
37 management of hypothyroidism.
- 38 • Although following protocol, this study consisted of a small sample size of  
39 participants in the North of England, reducing the transferability of the findings of  
40 this study to others contexts.  
41  
42  
43  
44

### 45 **Collaborators**

46  
47 Rosie Dew, PhD, Research Associate, University of Sunderland; Kathryn King, PhD Principal  
48 Lecturer in Nursing, University of Sunderland; Onyebuchi E Okosieme, MD, FRCP, Consultant  
49 Endocrinologist, Prince Charles Hospital, Cardiff; Simon Pearce, MD, FRCP, Professor of  
50 Endocrinology, Newcastle University; Gemma Donovan, MSc, Academic Pharmacist  
51 Practitioner, University of Sunderland; Peter Taylor, MSc Welsh Clinical Academic Trainee,  
52 Cardiff University School of Medicine; Janis Hickey, BA, Director, British Thyroid Foundation  
53 (BTF); Colin Dayan, PhD, FRCP, Professor of Clinical Diabetes and Metabolism, Cardiff  
54 University School of Medicine; Graham Leese, Consultant and Professor in Diabetes and  
55 Endocrinology, University of Dundee; Salman Razvi MD, FRCP, Consultant Endocrinologist  
56  
57  
58  
59

1  
2  
3 and Senior Clinical Lecturer, Queen Elizabeth Hospital, Gateshead and Newcastle University;  
4 Scott Wilkes, FRCGP PhD, Professor of General Practice and Primary Care, University of  
5 Sunderland.

### 6 7 **Address for correspondence**

8  
9 Professor Scott Wilkes, Faculty of Health Sciences and Wellbeing, Sciences Complex, City  
10 Campus, Chester Road, University of Sunderland, SR1 3SD.

## 11 12 **INTRODUCTION**

13  
14 Hypothyroidism is a common chronic disease caused by insufficient thyroid hormone  
15 production<sup>1-3</sup>. Levothyroxine, a synthetic isomer of the thyroid hormone thyroxine, is used to  
16 treat hypothyroidism and is dispensed to 99.7% of hypothyroid patients in England<sup>4</sup>. Dose  
17 increments are made following initiation of treatment to return serum thyroid stimulating  
18 hormone (TSH) levels into the reference range<sup>5</sup> and provide symptomatic relief<sup>6</sup>. Without  
19 correction, patients with abnormal thyroid results may have an increased risk of  
20 cardiovascular disease, dysrhythmias, fractures<sup>7</sup>, and are at risk of adverse effects on bone  
21 mass<sup>8</sup>, lipid metabolism<sup>9</sup>, blood pressure<sup>10</sup>, and cognitive function<sup>11 12</sup>. Even variation in  
22 thyroid function within the normal population reference range may also be associated with  
23 important differences in key health outcomes<sup>13 14</sup>. Furthermore, neglected hypothyroidism  
24 can result in life threatening myxoedema coma<sup>15</sup>. Patients with overt hypothyroidism may  
25 experience low energy levels, cold intolerance, aches and pains, weight gain, and changes in  
26 physical appearance.

27  
28  
29 The management of hypothyroidism is generally carried out in primary care and up till 2014  
30 GPs were required to maintain a register of hypothyroid patients as part of the Quality and  
31 Outcomes Framework. Hypothyroidism is considered a simple condition to manage<sup>16</sup> and  
32 levothyroxine is well tolerated by the majority of patients<sup>17</sup>. However, the therapeutic  
33 benefits of levothyroxine are sometimes unsatisfactory, and TSH levels higher than the  
34 reference range have been found in 11-27% of patients receiving thyroid replacement  
35 therapy, while the prevalence of low TSH levels has been reported to range from 20-41%<sup>7 18-</sup>  
36 <sup>21</sup>.

37  
38 Compliance<sup>22 23</sup>, pharmacogenomics associations<sup>24-28</sup> and interference from medication and  
39 comorbidities, such as autoimmune gastritis and coeliac disease<sup>23</sup>, have all been found to  
40 have an effect on thyroid therapy and it is likely that there are multifactorial reasons for sub-  
41 optimal treatment. However, only a limited number of studies to date have addressed  
42 potential solutions to sub-optimal thyroid hormone replacement in general practice. To  
43 address this problem, we previously explored the attitudes and perceptions of patients with  
44 hypothyroidism towards their treatment<sup>29</sup>. In the present study we have investigated the  
45 attitudes and perceptions towards the management of hypothyroidism amongst health  
46 professionals including GPs, nurse practitioners, pharmacists and practice nurses. We sought  
47 to determine the clinical management and behavioural factors that may influence the  
48 adequacy of thyroid hormone replacement in patients with hypothyroidism.

## 49 50 51 52 **METHOD**

### 53 54 *Design*

1  
2  
3 Using a grounded theory approach<sup>30</sup>, in-depth qualitative interviews were performed with  
4 health professionals to explore their experiences, attitudes, and perceptions of the  
5 treatment of hypothyroidism. Interviews were conducted by the same researcher (RD) and  
6 an initial semi-structured topic guide was used (Box 1). Themes from initial interviews were  
7 explored and developed in subsequent interviews, and were mapped to the constructs of  
8 the Theory of Planned Behaviour (TPB) to give an overall explanation of the data. The TPB  
9 describes the association between an individual's beliefs and their behaviour by considering  
10 the influence of their attitude towards a particular behaviour, subjective norms and  
11 perceived behavioural control<sup>31</sup>.

### 12 13 *Setting*

14  
15 Professionals from Northumberland, Tyne and Wear, Stockton-on-Tees and North Cumbria  
16 were invited to take part. Interviews were conducted between March and August 2016.

### 17 18 *Participants*

19  
20 Sixteen one-off interviews were conducted with nine general practitioners (GP), four  
21 pharmacists (P), two practice nurses (N) and one nurse practitioner (NP). Participants were  
22 recruited through the NIHR Clinical Research Network: North East and North Cumbria and  
23 local professional networks via mail and email. Interviews were conducted face-to-face at  
24 the participant's place of work or the University of Sunderland, however, due to participant  
25 availability, one GP was interviewed at home, and one GP interviewed by telephone. Only  
26 the participant and the researcher were present during the interviews, and the researcher  
27 had not met the participants previously. Participant characteristics are shown in Table 1.

28  
29 Confidentiality was assured, the process of the research explained and written consent was  
30 obtained prior to the interview. Interviews lasted approximately 45 minutes and  
31 interviewees were not paid for participation.

### 32 33 *Sampling*

34  
35 Using purposive sampling, participants were recruited from both rural and urban areas to  
36 provide an initial maximum variation sample<sup>30</sup>. To test emerging themes, theoretical  
37 sampling thereafter proceeded until data saturation was achieved and no new themes were  
38 forthcoming<sup>32</sup>. Data saturation occurred quickly in the information provided by the  
39 interviews from our allied health professional group, thus more GPs were recruited than  
40 other professionals.

### 41 42 *Analysis*

43  
44 Interviews were audio recorded and transcribed verbatim, and analysis was performed using  
45 Microsoft Word 2010. Open coding of transcripts preceded the categorisation of the data,  
46 and as the interviews progressed, themes emerging from the data were tested in  
47 subsequent interviews<sup>33</sup>. Notes made by RD after the interviews were considered during  
48 analysis. Data analysis occurred concurrently with the interviews, and constant comparison  
49 and iterative analysis of the interview data allowed for development and remodelling of  
50 themes until data saturation was achieved<sup>30</sup>. In-depth data analysis and negotiation of  
51 themes was conducted by RD, KK, and SW. Themes that emerged from the data are shown  
52 in Figure 1. Transcripts were returned to participants for comments and corrections;  
53 however, no feedback was received.

## RESULTS

### *Perceived Professional Control*

#### **Management of Hypothyroidism**

Generally health professionals found the management of hypothyroidism straightforward, relying on blood tests over non-specific clinical symptoms. However, there was uncertainty whether to start levothyroxine treatment in asymptomatic patients with borderline TSH levels, or patients with suggestive hypothyroid symptoms that did not have elevated TSH levels:

*It's relatively commonly and easily managed. And the medication is generally quite palatable for patients. And they largely feel better. (GP-1)*

*I think it's something that we often go into a bit of autopilot because we rely more on blood tests. (GP-6)*

*Should you treat them or should you not? ...we'll just keep an eye on the blood test. The other side of the coin is that they get labelled and start having treatment for something when actually if you just left them alone they would have been fine. (GP-8)*

Some professionals recounted patients finding information on levothyroxine alternatives from online forums. Alternative treatments or referring to an endocrinologist was a last resort following the unsuccessful management of TSH with levothyroxine. Only a minority described alternatives including liothyronine (a synthetic form of triiodothyronine, T3), Armour Thyroid (desiccated porcine thyroid extract) and homeopathic alternatives. Professionals had a tentative approach to levothyroxine alternatives, even with one example of a patient reporting feeling much better taking liothyronine, despite TSH and T3 levels suggesting over-treatment:

*People research it and they'll come back and say, "I want the T3 because it's better." (GP-2)*

*Yeah, so I've got one lady who... Who doesn't take any thyroxine and is... And is trying to manage her hypothyroidism with herbal remedies. (GP-9)*

*She is taking liothyronine... she had never felt better. But her TSH and her T3... suggest she's being over-treated. (NP)*

#### **Monitoring of Hypothyroidism**

Health professionals felt that blood test reminders and prescription renewal alerts were enablers of good thyroid management as were alerts to potentially interacting medication:

*One of our admin team does a regular search and just finds out who's out of date with their blood tests. (GP-7)*

*Because it's so good now, the computer system... Because it also alerts you if the doctors are prescribing something that interacts (N-2)*

1  
2  
3 *...we're quite good at making sure that patients come back to have their medication*  
4 *reviews (GP-4)*  
5

### 6 **Access**

7 Easy access to blood tests and electronic prescriptions were perceived by GPs to help  
8 patients access their levothyroxine; however, concern was raised that patients in nursing  
9 homes might not be as tightly monitored:  
10

11 *Electronic prescriptions and things have been helpful... not having the money, I*  
12 *guess, to get the bus up to pick up a prescription... we can send prescriptions*  
13 *electronically to the chemist. (GP-4)*  
14

15 *We do have phlebotomy appointments in the evenings and weekends. (GP-7)*  
16

17 *I suppose someone with dementia or in a nursing home is probably going to be less*  
18 *tightly monitored. (GP-5)*  
19

### 20 **Continuity of Care**

21 Continuity of care was perceived by GPs to be important for the management of  
22 hypothyroid patients. Interpretation of normal thyroid function was difficult without  
23 matching patients' expectations, symptoms and blood tests results:  
24

25 *So continuity of care does make a difference to patients who are difficult to manage*  
26 *or where compliance is potentially a problem. Because if they start dotting all over*  
27 *the place, then you know you have to work that thread back up. And it's all about*  
28 *trust. A lot of it is about trust in the GP. And that comes from continuity of care.*  
29 *(GP-1)*  
30

31 *I think sometimes if blood test results are going back to a different [GP] than*  
32 *normally sees the patient, then it may just say "normal". And there's a risk that you*  
33 *would just say normal. (GP-7)*  
34  
35

36 Pharmacists felt the advice they could give patients was limited by their lack of access to  
37 patient medical records, and that they could only advise depending on a patient's account of  
38 their TSH results and medications. Pharmacists felt that access to TSH results would save  
39 time and inaccuracies in advice they give:  
40

41 *And that's something that, you know, it would really help us if we had access to*  
42 *things like TSH results and things. Just as a second check, I think. (P-2)*  
43  
44

### 45 **Professional Knowledge**

46 Prescribers felt they would need to check which medications may interact with  
47 levothyroxine, and it was generally perceived that their knowledge of hypothyroidism  
48 pharmacokinetics could be increased. Most professionals felt that the GP had overall  
49 responsibility for knowledge acquisition:  
50

51 *I mean, off the top of my head, I actually couldn't tell you any interactions between*  
52 *thyroxine... Apart from... I think it's iron. (GP-8)*  
53

54 *I think I've hinted that there are some things that I could know a bit more about. (GP-*  
55 *5)*  
56  
57  
58  
59



1  
2  
3  
4 *I suppose I haven't really taken the trouble to learn because I know that somebody*  
5 *else is doing it. (N-2)*  
6

7 GPs and pharmacists generally perceived that patient knowledge of thyroid function was  
8 basic. Pharmacists mostly felt that patients were unaware of the risk of under or over  
9 treatment with levothyroxine:  
10

11 *I don't think many of them can really tell you what it's for, what the thyroid does or*  
12 *what the risks are of going too high or too low. (P-1)*  
13  
14

### 15 *Perceived Professional Responsibility*

#### 16 **Provision of Information**

17  
18 Generally health professionals provided verbal information about hypothyroidism and the  
19 importance of blood tests. Pharmacists described the need to avoid multivitamins, iron  
20 containing drugs, calcium containing drugs, indigestion remedies and coffee. Health  
21 professionals generally did not explain the effects of hypothyroidism on the thyroid:  
22

23  
24 *I'm not a leaflet person. I like to talk and tell them. And if I've got a visual aid, using*  
25 *the computer. I'll explain to that. (NP-1)*  
26

27 *Best in the morning. Not to take it [levothyroxine] with anything else – certainly not*  
28 *a cup of coffee. (P-3)*  
29

30 Generally, health professionals perceived that patients researched their own condition, or  
31 they would use leaflets from, or direct patients to patient.co.uk:  
32

33 *These days I would generally tell people to look it up on the internet. And I would*  
34 *usually direct them to a website. These days, mainly patient.co.uk. (GP-9)*  
35

36 *You know, they're quite happy, and they'll often do research themselves. (GP-1)*  
37

#### 38 **Use of Guidelines**

39 Local guidelines were used by the majority of GPs, although many were reliant upon the  
40 laboratory reference ranges. A few GPs felt that their management of hypothyroidism was  
41 not based on any guidelines:  
42

43  
44 *I think that's all in the TRAMP guidelines. I think I try to follow what I'm meant to do.*  
45 *(GP-4)*  
46

47 *I did see some guidance from North of Tyne [Area Prescribing Committee], which was*  
48 *very helpful. (GP-1)*  
49

50 *I think the idea is just to try and get the result sitting somewhere in that [laboratory*  
51 *reference range]. (GP-8)*  
52

53 *You interpret the guidelines to treat the patient, not fitting the patient to the*  
54 *guideline. (GP-3)*  
55  
56  
57  
58

### Individualistic Approach

Most prescribers perceived that an individualistic approach was necessary for optimal thyroid hormone replacement for each patient. The general consensus was that GPs were happy to increase levothyroxine doses to make patients feel better as long as TSH levels remained within range:

*I aim to get them within range and feeling okay. (GP-9)*

*I know there is evidence to suggest that you should keep them more to the suppressed end. If they're in the parameters, to me, they are controlled. (NP-1)*

*I think the current is to try and push their TSH levels down a bit more from four to, sort of, more like two. (GP-1)*

### Overtreatment with Levothyroxine

Professionals described the difficulty of attributing symptoms to thyroid disease when a levothyroxine treated patient's TSH remains in range:

*But my instinct is that if you say you're unwell and your thyroid blood tests are normal, I don't think you're unwell because of your thyroid problem. I would be... I would be very reluctant to give somebody extra thyroxine just in case. (GP-6)*

Prescribers were conscious of the cardiac complications associated with giving a patient too much levothyroxine too quickly. Extra caution was described when treating the elderly where the risks of fractures may be high:

*You need to be careful that you don't suppress it too much, because that comes with some clinical risks around fractures – particularly in elderly patients. (GP-1)*

Most prescribers were not prepared to over-treat patients with levothyroxine due to the associated risks. One GP recounted that she had intentionally over suppressed a patient's TSH level, explaining that she knew the patient well; the patient had a good knowledge of their condition, was aware of the risks of over suppression, and was miserable on a lower dose. However, another GP felt that some colleagues choose to ignore over suppression of TSH:

*And if that little old lady then falls over or fractures... And sues you, because you've, you know, artificially suppressed her TSH. (GP-1)*

*I felt that she was making an informed decision. She knew what the risks were. Especially as she got older... being over-treated. (GP-3)*

*I've worked in a new practice, patients that have had TSH below 0.02 for a long time and they've just been told it's normal. (GP-5)*

### Reliability of Hypothyroid Symptoms

Professionals had a good knowledge of hypothyroid symptoms and felt that if they knew the patient then developing slowness and change in mood made them suspect hypothyroidism. GPs felt that the symptoms of hypothyroidism were nonspecific and overlapped with a number of clinical conditions. Moreover, professionals perceived that patients often feel that their thyroid is accountable for many symptoms, particularly weight gain and tiredness:

1  
2  
3  
4 *So, you know, tiredness being one, weight gain being another, dry skin, intolerance*  
5 *to cold. But... Those are symptoms of lots of conditions, both physical health and*  
6 *mental health problems. (GP-1)*  
7

8 *Once they've got a diagnosis of underactive thyroid, I think they blame it. (GP-2)*  
9

## 10 11 *Attitudes to Thyroid Control*

### 12 13 **Responsibility**

14 Professionals felt that it was the patient's responsibility to attend blood tests, for good  
15 medication adherence, and to challenge the GP if they were feeling symptomatic, however,  
16 it was perceived that the GP had overall responsibility:  
17

18 *I think it's in partnership. Because if the patient doesn't take the tablets, then you're*  
19 *not going to get control... and you don't check the blood tests and manage them*  
20 *appropriately, you're not going to get good control. (GP-3)*  
21

22  
23 *Mainly the GP is their GP, who's got the overall responsibility of looking after that*  
24 *patient. (NP-1)*  
25

### 26 **Poor Levothyroxine Adherence as the Main Reason for Suboptimal Treatment**

27 Some professionals in our study felt that avoiding weight gain encouraged levothyroxine  
28 adherence in patients. Health professionals believed that poor adherence was the main  
29 reason patients struggle to achieve optimal thyroid hormone replacement. Additionally, the  
30 majority of professionals said they had experienced a small proportion of patients who  
31 would take more levothyroxine than prescribed to alleviate tiredness or in an attempt to  
32 lose weight:  
33

34 *They think, oh, if I don't take it, I'll put even more weight on. So I think there is a lot*  
35 *of that going on. (N-2)*  
36

37  
38 *If they could get a really abnormal TSH - that's in the 30s or 40s - it is a compliance...*  
39 *A concordance. (GP-6)*  
40

41 *Certainly one patient I can remember who had said he had been feeling tired and*  
42 *have been taking an extra tablet. (P-1)*  
43

44 *... likes to run his TSH low. And there is no arguing with him, because he will just take*  
45 *what he wants to take. He'll come in and lie. (GP-8)*  
46

### 47 **The Priority of Hypothyroidism**

48 Health professionals believed patients may not prioritise hypothyroidism over health  
49 conditions such as heart disease, diabetes, hypertension and hypercholesterolaemia, and  
50 hypothyroidism was not a routine focus of medication reviews. Removal of hypothyroidism  
51 from the Quality and Outcome Framework (QOF) targets led to suspicions of reduced control  
52 and monitoring in some practices:  
53

54 *People who are on Dosette trays... they're more concerned about the other*  
55 *conditions that they have. (P-3)*  
56  
57  
58  
59

1  
2  
3  
4 *There's certain drugs that we get, sort of, payment for sitting down with patients*  
5 *and really going through how they work and how they should be taken. (P-2)*  
6

7 *And it used to be a QOF target that each year they had to have an annual TSH, which*  
8 *was a very easy target to hit. And then it stopped about two years ago. So I think*  
9 *some practices, potentially, have sort of let their thyroid management drop. (GP-2)*  
10

### 11 **Time Restrictions**

12 GPs and pharmacists felt that lack of time limited the information exchanged when speaking  
13 to a patient. One pharmacist felt there was pressure to focus on medication reviews,  
14 reducing the time available to give advice to other patients:  
15

16 *You're always short of time. It's always a problem. (GP-7)*  
17

18 *They encourage us to do new services, such as medication use reviews and new*  
19 *medicine service reviews in pharmacies. We don't necessarily have as much time as*  
20 *we would like to stand on the counter and talk to patients (P-1)*  
21

22  
23 Concern over prioritising the busy GP workload was articulated, with thyroid function tests  
24 potentially accepted as being normal when they may not be:  
25

26 *And we've got an awful lot on our plates – using that old excuse again. But we're*  
27 *really, really busy. And... Sometimes the blood results come through and you're just*  
28 *like, well, actually they might have missed it for the last few days or whatever. And*  
29 *just bounce it through, you know. And then the patient... It's on the patient's head*  
30 *to ring up for their results and check that their levels are okay. (GP-8)*  
31

### 32 **Factors that Interact with Treatment for Hypothyroidism**

33 GPs and pharmacists felt that if patients had an elevated TSH but reported that they were  
34 compliant then it may be due to other medication affecting the absorption of levothyroxine.  
35 Health professionals also felt that stress, diet, alcohol, coffee, smoking, having a busy  
36 lifestyle, co-morbidities, other medications, mental health, learning disabilities, deafness and  
37 dementia could all have an effect on optimal thyroid hormone replacement:  
38

39 *So I guess when it's [TSH] too high it's usually like what I said before – are you taking*  
40 *your medication at all? Are there other reasons why it might be that you're not*  
41 *absorbing it? Like the medication? Other conditions? (GP-4)*  
42

43 *And I don't think people had realised for many years, is the caffeine thing. And that's*  
44 *the kind of thing that could come out in an MUR [medicine use review]. So are they*  
45 *drinking it with a cup of coffee in a morning? And calcium supplements as well. (P-3)*  
46  
47

### 48 **Discussion**

#### 49 **Summary**

50  
51  
52 Professionals perceived that hypothyroidism was an easy condition to manage, and felt they  
53 relied on blood tests over non-specific clinical symptoms to confirm a diagnosis. However,  
54 professionals generally perceived they had a lack of in-depth knowledge of medication  
55 interaction. On the other hand pharmacists felt they could provide limited advice due to  
56  
57  
58  
59

1  
2  
3 their lack of access to patient data and lack of time. Enablers to improve the management  
4 of hypothyroidism included continuity of care, reminders for blood tests, system alerts for  
5 medication interactions and prescription renewal, and easy access to blood tests and  
6 levothyroxine prescriptions for patients.  
7

8 Most prescribers followed local guidelines for the management of hypothyroidism, and  
9 would only increase the levothyroxine dose to improve symptom control as long as TSH  
10 levels remained within range. However, one GP recounted over suppressing a patient at the  
11 patient's request. The information exchanged between professional and patient was limited  
12 by time restrictions, with most prescribers assuming that patients would research their  
13 condition online. Written information leaflets were rarely provided to patients.  
14

15 Attitudes towards hypothyroidism included seeing the condition as less serious and more  
16 straightforward than other health conditions and that poor compliance was the main reason  
17 for inadequate thyroid control. However, interfering factors such as stress, other conditions  
18 and concomitant medication were acknowledged. GPs felt they were mainly responsible for  
19 a patient's treatment, but stressed that good medication adherence by patients was  
20 important for optimal treatment.  
21

22 Professionals will usually strive to hold all attitudes, beliefs and behaviours in harmony<sup>34</sup>.  
23 However, this study has highlighted the cognitive dissonance between attitudes and beliefs  
24 versus behaviours that exist. The strongest example of this is the known detrimental effects  
25 of suboptimal treatment versus the acceptance of being out of range through perceived  
26 non-adherence, an explanation not supported by our recent evaluation of patient  
27 perceptions and attitudes<sup>29</sup>.  
28  
29

### 30 *Comparisons with existing literature*

31

32 Similar to the findings of our study, the management of hypothyroidism has been reported  
33 to be straightforward<sup>16</sup>. Like the GPs in our study, continuity of care was described by GPs in  
34 a previous qualitative study to enable them to provide higher quality of care in general  
35 practice due to the personal relationships that had formed<sup>35</sup>. However, health professionals  
36 generally felt they had incomplete knowledge of hypothyroidism, which was also found for  
37 other diseases such as gout<sup>36</sup> and dementia<sup>37</sup>. Access to patients medical records suggested  
38 by the pharmacists in this study has also been recommended to improve care and patient  
39 safety within Britain by the Royal Pharmaceutical Society<sup>38</sup>. Including pharmacists in health  
40 care teams has been shown to reduce hospital admissions and medical costs of patients  
41 aged 80 years of age or older in Sweden<sup>39</sup>, and pharmacist involvement has also been  
42 associated with lower rates of adverse drug events<sup>40</sup>.  
43  
44

45 Having an individualistic approach for each patient to tailor TSH levels within the reference  
46 range has been suggested to be the optimal approach for management of hypothyroid  
47 patients. Deliberate TSH suppression (<0.1 mU/L) with high doses of levothyroxine, which  
48 was avoided by the majority of GPs in our study, is not recommended due to the potential  
49 risk of heart disease, stroke, osteoporosis and fractures<sup>41</sup>. Lack of agreement with national  
50 guidelines has been identified by Lugtenberg et al., (2009) to be the main barrier to  
51 guideline adherence by GPs, while lack of familiarity, lack of self-efficacy and patient factors  
52 such as disagreement with guideline recommendations or not attending appointments were  
53 also barriers<sup>42</sup>, which may also explain the variation seen between the guideline use by GPs  
54 in our study. In our previously published work with hypothyroid patients, patients felt that  
55 professionals were more inclined to treat their TSH levels than their symptoms and that they  
56  
57  
58  
59  
60

1  
2  
3 were not given very much information at the time of diagnosis<sup>29</sup>, as reported by some  
4 professionals in this study.  
5

6 Time was a barrier to thyroid management identified by health professionals in our study,  
7 and is a well-documented limitation in primary care<sup>43 44</sup>. However, previous studies have  
8 shown that although time is a limitation in terms of the information exchanged, it is  
9 consultation quality rather than the length of appointment that is more impactful<sup>44</sup>. Poor  
10 levothyroxine adherence, medication interactions and co-morbidities have been reported  
11 to have an effect on thyroid replacement therapy<sup>45</sup>, which were some of the barriers reported  
12 in this study. However, in our qualitative interview study with hypothyroid patients, good  
13 levothyroxine adherence was reported by nearly all patients, even those who had TSH levels  
14 outside of the reference range<sup>29</sup>, suggesting that the reasons for inadequate thyroid  
15 treatment may lie deeper than the typical assumptions by professionals that poor adherence  
16 is the main reason for suboptimal treatment<sup>22 23</sup>.  
17

### 18 *Strengths and weaknesses*

19  
20  
21 Due to time restrictions of this research project, this study did not have the opportunity to  
22 be pilot tested, which may have affected how the interviews progressed. Moreover, no  
23 feedback on their transcripts was provided by participants; feedback may have contributed  
24 to enriching the data further.  
25

26 Although this study was conducted with a sample of 16 participants in the North of England,  
27 and may not be generally applicable, the findings are transferrable within this professional  
28 population, and this study provides novel insights into the attitudes, experiences and  
29 behaviour of professionals involved in the management of hypothyroidism.  
30

### 31 *Implications for future research and clinical practice*

32  
33 Quantifying the extent that clinical, behavioural and pharmacogenomic associations may  
34 affect levothyroxine therapy and providing this information to professionals involved in  
35 management of hypothyroidism may improve treatment for this group of patients. However,  
36 it should be considered that professionals in general practice have limited time and  
37 expertise. Increasing the involvement of pharmacists or practice nurses in the management  
38 of hypothyroidism may help relieve the pressure on GPs and may also increase continuity of  
39 care, for example through pharmacist led medication reviews or specific chronic disease  
40 management clinics for this cohort of patients.  
41

42  
43 Consistent provision of patient information leaflets and discussions about hypothyroidism  
44 would help increase patient understanding and this type of information can be exchanged in  
45 a short period of time, and may reduce the time pressures on GPs if patients are more  
46 informed. Clarity on the timing of initiation of treatment in asymptomatic patients with  
47 slightly elevated TSH, and an age specific and symptom focus were appropriate may help to  
48 improve the management of hypothyroid patients within general practice.  
49

### 50 **Funding body**

51  
52 This work was supported by Amdipharm Mercury Company Limited (RT/6702). The funder  
53 has had no influence in the design, analysis or production of this manuscript. All researchers  
54 involved in the production of this paper are independent from the funder.  
55  
56  
57  
58  
59  
60

### Ethical approval

Ethical approval was granted from NRES Committee West Midlands - South Birmingham REC (REC reference 15/WM/0345) with SSA approval from Northumberland, Gateshead, and South Tyneside Local Research Ethics Committees. Approval was also granted from the University of Sunderland Research Ethics Committee.

### Competing interests

The authors have stated that there are none

### Contribution

SW designed the study. RD was responsible for the recruitment and interviewing of participants. RD gained qualitative research skills through attendance at a qualitative interview training course at Newcastle University, and from working on previous research projects. RD, SW and KK were involved in the in-depth data analysis and development of themes that emerged from the data. RD wrote the first draft of this paper. OO, SP, GD, PT, JH, CD, GL and SR were involved in the overall explanation of the data and revision of the final manuscript.

### Data sharing

No additional data are available

### Acknowledgements

The authors would like to acknowledge University of Sunderland for sponsoring this study. Thank you to Sally Dunn, Claire Graham, and Shona Haining funded from the NIHR Clinical Research Network: North East and North Cumbria, working for North of England Commissioning Support unit (NECS) for their efficient and effective assistance during recruitment of participants. Finally, many thanks to all the professionals that volunteered to be interviewed in our study.

### References

1. Tunbridge WM, Evered DC, Hall R, Appleton D, Brewis M, Clark F, et al. The spectrum of thyroid disease in a community: the Whickham survey. *Clin Endocrinol (Oxf)* 1977;7:481-93.
2. Vanderpump MPJ. The Epidemiology of Thyroid Diseases. In: Werner SC, Ingbar SH, Braverman LE, Utiger RD, editors. *Werner & Ingbar's the Thyroid: A Fundamental and Clinical Text, Volume 549*: Lippincott Williams & Wilkins, 2005:398-406.
3. Chaker L, Bianco AC, Jonklaas J, Peeters RP. Hypothyroidism. *Lancet* 2017.
4. Health and Social Care Information Centre (HSCIC). Prescriptions Dispensed in the Community England 2005-2015, 2016.
5. Beastall GH, Beckett GJ, Franklyn J, D. FW, Hickey J, John R, et al. UK Guidelines for the Use of Thyroid Function Tests. The Association for Clinical Biochemistry, British Thyroid Association, British Thyroid Foundation. 2006.
6. Vanderpump MPJ, Ahlquist JAO, Franklyn JA, Clayton RN. Consensus statement for good practice and audit measures in the management of hypothyroidism and hyperthyroidism. *BMJ* 1996;313:539 - 44.

- 1
  - 2
  - 3
  - 4
  - 5
  - 6
  - 7
  - 8
  - 9
  - 10
  - 11
  - 12
  - 13
  - 14
  - 15
  - 16
  - 17
  - 18
  - 19
  - 20
  - 21
  - 22
  - 23
  - 24
  - 25
  - 26
  - 27
  - 28
  - 29
  - 30
  - 31
  - 32
  - 33
  - 34
  - 35
  - 36
  - 37
  - 38
  - 39
  - 40
  - 41
  - 42
  - 43
  - 44
  - 45
  - 46
  - 47
  - 48
  - 49
  - 50
  - 51
  - 52
  - 53
  - 54
  - 55
  - 56
  - 57
  - 58
  - 59
  - 60
7. Flynn RW, Bonellie SR, Jung RT, MacDonald TM, Morris AD, Leese GP. Serum thyroid-stimulating hormone concentration and morbidity from cardiovascular disease and fractures in patients on long-term thyroxine therapy. *J Clin Endocrinol Metab* 2010;95(1):186-93.
  8. Uzzan B, Campos J, Cucherat M, Nony P, Boissel JP, Perret GY. Effects on bone mass of long term treatment with thyroid hormones: a meta-analysis. *J Clin Endocrinol Metab* 2011;81(12):4278-89.
  9. Duntas LH. Thyroid disease and lipids. *Thyroid* 2002;12:287-93.
  10. Fommei E, Iervasi G. The role of thyroid hormone in blood pressure homeostasis: evidence from short-term hypothyroidism in humans. *J Clin Endocrinol Metab* 2002;87:1996-2000.
  11. Dugbartey AT. Neurocognitive aspects of hypothyroidism. *Arch Intern Med* 1998;158:1413-18.
  12. McMillan C, Bradley C, Razvi S, Weaver J. Evaluation of new measures of the impact of hypothyroidism on quality of life and symptoms: the ThyDQoL and ThySRQ. *Value Health* 2008;11(2):285-94.
  13. Dayan CM, Saravanan P, Bayly G. Whose normal thyroid function is better—yours or mine? *Lancet* 2002:353-54.
  14. Taylor PN, Razvi S, Pearce SH, Dayan CM. A Review of the Clinical Consequences of Variation in Thyroid Function Within the Reference Range. *J Clin Endocrinol Metab* 2013;98(9):3562-71.
  15. Fliers E, Wiersinga WM. Myxedema coma. *Rev Endocr Metab Disord* 2003;4:137-41.
  16. Vaidya B, Pearce SH. Management of hypothyroidism in adults. *BMJ* 2008;337:284-89.
  17. Biondi B, Wartofsky L. Combination treatment with T4 and T3: toward personalized replacement therapy in hypothyroidism? *J Clin Endocrinol Metab* 2012;97:2256-71.
  18. Somwaru LL, Arnold AM, Joshi N, Fried LP, Cappola AR. High frequency of and factors associated with thyroid hormone over-replacement and under-replacement in men and women aged 65 and over. *J Clin Endocrinol Metab* 2009;94(4):1342-45.
  19. Okosieme OE, Belludi G, Spittle K, Kadiyala R, Richards J. Adequacy of thyroid hormone replacement in a general population. *Qjm* 2011;104(5):395-401.
  20. Parle JV, Franklyn JA, Cross KW, Jones SR, Sheppard MC. Thyroxine prescription in the community: serum thyroid stimulating hormone level assays as an indicator of undertreatment or overtreatment. *Br J Gen Pract* 1993;43:107-09.
  21. Taylor PN, Iqbal A, Minassian C, Sayers A, Draman MS, Greenwood R, et al. Falling threshold for treatment of borderline elevated thyrotropin levels—balancing benefits and risks: evidence from a large community-based study. *JAMA Intern Med* 2014;174:32-39.
  22. Briesacher BA, Andrade SE, Fouayzi H, Chan KA. Comparison of drug adherence rates among patients with seven different medical conditions. *Pharmacother* 2008;28(4):437-43.
  23. Robertson HMA, Narayanaswamy AKP, Pereira O, Copland SA, Herriot R, McKinlay AW, et al. Factors Contributing to High Dose Levothyroxine Doses in Primary Hypothyroidism: An Interventional Audit of a Large Community Database. *Thyroid* 2014;24(12):1765-71.



- 1
  - 2
  - 3
  - 4
  - 5
  - 6
  - 7
  - 8
  - 9
  - 10
  - 11
  - 12
  - 13
  - 14
  - 15
  - 16
  - 17
  - 18
  - 19
  - 20
  - 21
  - 22
  - 23
  - 24
  - 25
  - 26
  - 27
  - 28
  - 29
  - 30
  - 31
  - 32
  - 33
  - 34
  - 35
  - 36
  - 37
  - 38
  - 39
  - 40
  - 41
  - 42
  - 43
  - 44
  - 45
  - 46
  - 47
  - 48
  - 49
  - 50
  - 51
  - 52
  - 53
  - 54
  - 55
  - 56
  - 57
  - 58
  - 59
  - 60
24. Andersen S, Pedersen KM, Bruun NH, Laurberg P. Narrow individual variations in serum T(4) and T(3) in normal subjects: a clue to the understanding of subclinical thyroid disease. *J Clin Endocrinol Metab* 2002;87(3):1068-72.
25. van der Deure WM, Friesema EC, de Jong FJ, de Rijke YB, de Jong FH, Uitterlinden AG, et al. Organic anion transporter 1B1: an important factor in hepatic thyroid hormone and estrogen transport and metabolism. *Endocrinol* 2008;149(9):4695-701.
26. Torlontano M, Durante C, Torrente I, Crocetti U, Augello G, Ronga G, et al. Type 2 Deiodinase Polymorphism (Threonine 92 Alanine) Predicts l-Thyroxine Dose to Achieve Target Thyrotropin Levels in Thyroidectomized Patients. *J Clin Endocrinol Metab* 2008;93(3):910-13.
27. Taylor PN, Porcu E, Chew S, Campbell PJ, Traglia M, Brown SJ, et al. Whole-genome sequence-based analysis of thyroid function. *Nat Commun* 2015.
28. Panicker V, Saravanan P, Vaidya B, Evans J, Hattersley AT, Frayling TM, et al. Common variation in the DIO2 gene predicts baseline psychological well-being and response to combination thyroxine plus triiodothyronine therapy in hypothyroid patients. *J Clin Endocrinol Metab* 2009;94(5):1623-29.
29. Dew R, King K, Okosieme OE, Pearce S, Donovan G, Taylor PN, et al. Patients' Attitudes and Perceptions towards Treatment of Hypothyroidism in General Practice. *BJGP Open* 2017.
30. Strauss AC, J. *Basics of qualitative research. Grounded theory procedures and techniques*. Newbury Park: SAGE, 1990.
31. Ajzen I. The theory of planned behavior. *Organ Behav Hum Decis Process* 1991;50(2):179-211.
32. Glaser B, Strauss A. *The Discovery of Grounded Theory*. Chicago: Aldine, 1967.
33. Denzin NK, Lincoln YS. *Handbook of Qualitative Research*. London: Sage Publications, 1994.
34. Festinger L. *A Theory of Cognitive Dissonance*. California: Stanford University Press, 1957.
35. Ridd M, Shaw A, Salisbury C. 'Two sides of the coin'—the value of personal continuity to GPs: a qualitative interview study. *Fam Pract* 2006;23(4):461-68.
36. Spencer K, Carr A, Doherty M. Patient and provider barriers to effective management of gout in general practice: a qualitative study. *Ann Rheum Dis* 2012;71:1490-95.
37. Pathak KP, Montgomery A. General practitioners' knowledge, practices, and obstacles in the diagnosis and management of dementia. *Aging Ment Health* 2015;19(10):912-20.
38. England RPS. Professional Position Statement: Access to the Patient Health Record (England).
39. Gillespie U, Alassaad A, Henrohn D, Garmo H, Hammarlund-Udenaes M, Toss H, et al. A Comprehensive Pharmacist Intervention to Reduce Morbidity in Patients 80 Years or Older A Randomized Controlled Trial. *Arch Intern Med* 2009;169(9):894-900.
40. Schnipper JL, Kirwin JL, Cotugno MC, Wahlstrom SA, Brown BA, Tarvin E, et al. Role of Pharmacist Counseling in Preventing Adverse Drug Events After Hospitalization. *Arch Intern Med* 2006;166:565-71.
41. Okosieme O, Gilbert J, Abraham P, Boelaert K, Dayan C, Gurnell M, et al. Management of primary hypothyroidism: statement by the British Thyroid Association Executive Committee. *Clin Endocrinol (Oxf)* 2016;84(6):799-808.

- 1  
2  
3 42. Lugtenberg M, Zegers-van Schaick JM, Westert GP, Burgers JS. Why don't  
4 physicians adhere to guideline recommendations in practice? An analysis of  
5 barriers among Dutch general practitioners. *Implement Sci* 2009.  
6 43. Albers-Heitner P, Berghmans B, Nieman F, Lagro-Janssen T, Winkens R.  
7 Adherence to professional guidelines for patients with urinary incontinence by  
8 general practitioners: a cross-sectional study. *J Eval Clin Pract*  
9 2008;14(5):807-11.  
10 44. Dugdale DC, Epstein R, Pantilat SZ. Time and the Patient–Physician  
11 Relationship. *J Gen Intern Med* 1999;14(S1):34-40.  
12 45. Okosieme OE. Thyroid hormone replacement: current status and challenges.  
13 *Expert Opin Pharmacother* 2011;12:2315-28.  
14  
15  
16  
17  
18  
19  
20  
21  
22  
23  
24  
25  
26  
27  
28  
29  
30  
31  
32  
33  
34  
35  
36  
37  
38  
39  
40  
41  
42  
43  
44  
45  
46  
47  
48  
49  
50  
51  
52  
53  
54  
55  
56  
57  
58  
59  
60

**Box 1. Initial Topic Guide for Interviews**

What is your role in the management of patients with hypothyroidism?

*Symptoms of hypothyroidism*

How would you describe your familiarity with the symptoms of hypothyroidism?

Are you confident to spot patients with hypothyroidism? Why? Example?

What makes you suspect hypothyroidism? Why? Example?

*Diagnosis*

How would you describe your confidence in making a diagnosis of hypothyroidism?

*Referral*

Do you refer patients who have abnormal thyroid function tests? Can you describe the process?

Do you refer patients to get a diagnosis of hypothyroidism?

Who do you refer to? Can you describe the process?

*Management*

What do you think about the management of hypothyroidism in general practice? Are you happy to manage hypothyroidism in general practice?

How often do you check thyroid function tests?

Does this differ for controlled/out of control patients?

Are there any instances when you would refer/seek help? Example?

How do you manage patients who complain of symptoms and the TSH is in the normal range? Example? Or would in theory? What are your thoughts on this?

Do you find it difficult to keep the TSH in the reference range?

What do you think about changing levothyroxine dose for patients? Do you think the increments of 25mcg of levothyroxine too great?

What are your thoughts about hypothyroid patients who are out of control? Are you concerned about hypothyroid patients who are out of control?

What are your thoughts on patients with:

High TSH (usually indicating too little levothyroxine)?

Low TSH (usually indicating too much levothyroxine)?

How do you manage patients who insist on taking more levothyroxine than their TSH suggests (i.e. over-suppressed)?

What do you think about patients who have high TSH blood tests which suggests that they are not taking enough levothyroxine? Have you experienced this?

What are the main influences that you see that contribute to patients struggling to control their hypothyroidism?

Can you predict which patients will struggle to control their hypothyroidism? Example?

Figure 1 Themes and categories that emerged from the data

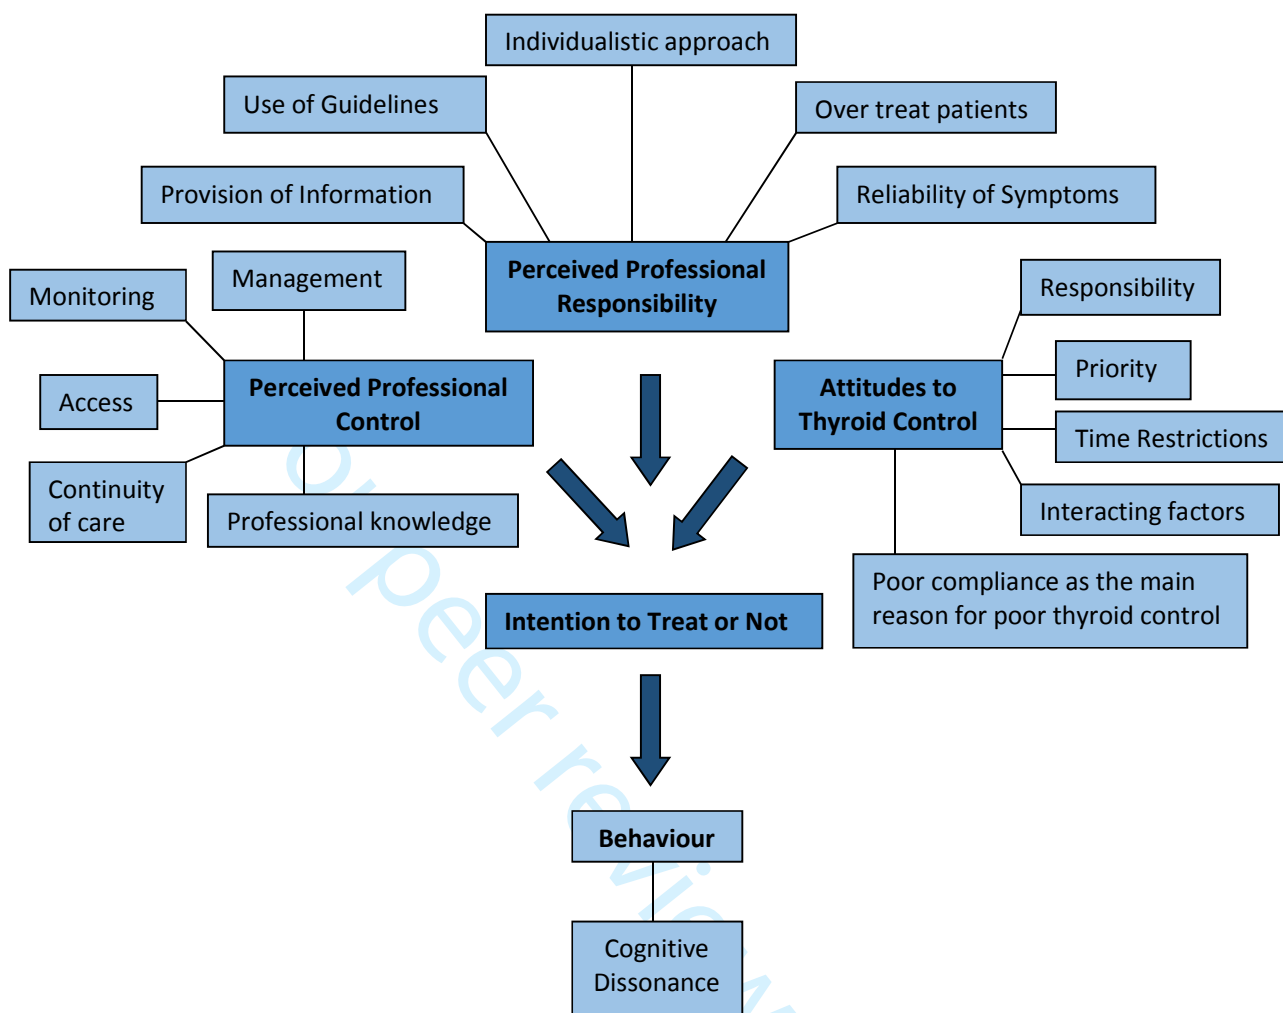

Table 1 Participant Characteristics

| Job Role                    | Location | Age | Gender | Years Qualified |
|-----------------------------|----------|-----|--------|-----------------|
| <b>General Practitioner</b> |          |     |        |                 |
| GP-1                        | Urban    | 45  | Female | 10              |
| GP-2                        | Rural    | 40  | Male   | 14              |
| GP-3                        | Urban    | 59  | Female | 36              |
| GP-4                        | Urban    | 36  | Female | 10              |
| GP-5                        | Urban    | 39  | Female | 16              |
| GP-6                        | Urban    | 51  | Male   | 27              |
| GP-7                        | Rural    | 52  | Female | 29              |
| GP-8                        | Rural    | 39  | Female | 14              |
| GP-9                        | Rural    | 48  | Male   | 20              |
| <b>Nurse practitioner</b>   |          |     |        |                 |
| NP-1                        | Rural    | 55  | Female | 35              |
| <b>Practice Nurse</b>       |          |     |        |                 |
| N-1                         | Urban    | 58  | Female | 40              |
| N-2                         | Rural    | 60  | Female | 40              |
| <b>Community Pharmacist</b> |          |     |        |                 |
| P-1                         | Urban    | 30  | Male   | 8               |
| P-2                         | Urban    | 29  | Female | 6               |
| P-3                         | Urban    | 39  | Female | 15              |
| P-4                         | Urban    | 25  | Female | 2               |

## Consolidated criteria for reporting qualitative studies (COREQ): 32-item checklist

Developed from:

Tong A, Sainsbury P, Craig J. Consolidated criteria for reporting qualitative research (COREQ): a 32-item checklist for interviews and focus groups. *International Journal for Quality in Health Care*. 2007. Volume 19, Number 6: pp. 349 – 357

**YOU MUST PROVIDE A RESPONSE FOR ALL ITEMS. ENTER N/A IF NOT APPLICABLE**

| No. Item                                       | Guide questions/description                                                                                                                              | Reported on Page #        |
|------------------------------------------------|----------------------------------------------------------------------------------------------------------------------------------------------------------|---------------------------|
| <b>Domain 1: Research team and reflexivity</b> |                                                                                                                                                          |                           |
| <i>Personal Characteristics</i>                |                                                                                                                                                          |                           |
| 1. Interviewer/facilitator                     | Which author/s conducted the interview or focus group?                                                                                                   | Methods                   |
| 2. Credentials                                 | What were the researcher's credentials?<br>E.g. PhD, MD                                                                                                  | Collaborators             |
| 3. Occupation                                  | What was their occupation at the time of the study?                                                                                                      | Collaborators             |
| 4. Gender                                      | Was the researcher male or female?                                                                                                                       | N/A                       |
| 5. Experience and training                     | What experience or training did the researcher have?                                                                                                     | Contribution              |
| <i>Relationship with participants</i>          |                                                                                                                                                          |                           |
| 6. Relationship established                    | Was a relationship established prior to study commencement?                                                                                              | Methods                   |
| 7. Participant knowledge of the interviewer    | What did the participants know about the researcher? e.g. personal goals, reasons for doing the research                                                 | Strengths and Limitations |
| 8. Interviewer characteristics                 | What characteristics were reported about the interviewer/facilitator? e.g. Bias, assumptions, reasons and interests in the research topic                | Strengths and Limitations |
| <b>Domain 2: study design</b>                  |                                                                                                                                                          |                           |
| <i>Theoretical framework</i>                   |                                                                                                                                                          |                           |
| 9. Methodological orientation and Theory       | What methodological orientation was stated to underpin the study? e.g. grounded theory, discourse analysis, ethnography, phenomenology, content analysis | Methods                   |
| <i>Participant selection</i>                   |                                                                                                                                                          |                           |
| 10. Sampling                                   | How were participants selected? e.g. purposive, convenience, consecutive, snowball                                                                       | Methods                   |
| 11. Method of approach                         | How were participants approached? e.g. face-to-face, telephone, mail, email                                                                              | Methods                   |
| 12. Sample size                                | How many participants were in the study?                                                                                                                 | Methods                   |

|                                        |                                                                                                                                 |                                       |
|----------------------------------------|---------------------------------------------------------------------------------------------------------------------------------|---------------------------------------|
| 13. Non-participation                  | How many people refused to participate or dropped out? Reasons?                                                                 | N/A                                   |
| <i>Setting</i>                         |                                                                                                                                 |                                       |
| 14. Setting of data collection         | Where was the data collected? e.g. home, clinic, workplace                                                                      | Methods                               |
| 15. Presence of non-participants       | Was anyone else present besides the participants and researchers?                                                               | Methods                               |
| 16. Description of sample              | What are the important characteristics of the sample? e.g. demographic data, date                                               | Methods                               |
| <i>Data collection</i>                 |                                                                                                                                 |                                       |
| 17. Interview guide                    | Were questions, prompts, guides provided by the authors? Was it pilot tested?                                                   | Methods and Strengths and Limitations |
| 18. Repeat interviews                  | Were repeat inter views carried out? If yes, how many?                                                                          | Methods                               |
| 19. Audio/visual recording             | Did the research use audio or visual recording to collect the data?                                                             | Methods                               |
| 20. Field notes                        | Were field notes made during and/or after the inter view or focus group?                                                        | Methods                               |
| 21. Duration                           | What was the duration of the inter views or focus group?                                                                        | Methods                               |
| 22. Data saturation                    | Was data saturation discussed?                                                                                                  | Methods                               |
| 23. Transcripts returned               | Were transcripts returned to participants for comment and/or correction?                                                        | Methods                               |
| <b>Domain 3: analysis and findings</b> |                                                                                                                                 |                                       |
| <i>Data analysis</i>                   |                                                                                                                                 |                                       |
| 24. Number of data coders              | How many data coders coded the data?                                                                                            | Methods                               |
| 25. Description of the coding tree     | Did authors provide a description of the coding tree?                                                                           | Methods                               |
| 26. Derivation of themes               | Were themes identified in advance or derived from the data?                                                                     | Methods                               |
| 27. Software                           | What software, if applicable, was used to manage the data?                                                                      | Methods                               |
| 28. Participant checking               | Did participants provide feedback on the findings?                                                                              | Methods + Strengths and limitations   |
| <i>Reporting</i>                       |                                                                                                                                 |                                       |
| 29. Quotations presented               | Were participant quotations presented to illustrate the themes/findings? Was each quotation identified? e.g. participant number | Results                               |
| 30. Data and findings consistent       | Was there consistency between the data presented and the findings?                                                              | Results                               |
| 31. Clarity of major themes            | Were major themes clearly presented in the findings?                                                                            | Results                               |
| 32. Clarity of minor themes            | Is there a description of diverse cases or discussion of minor themes?                                                          | Results                               |

1  
2  
3 **Once you have completed this checklist, please save a copy and upload it as part**  
4 **of your submission. When requested to do so as part of the upload process,**  
5 **please select the file type: *Checklist*. You will NOT be able to proceed with**  
6 **submission unless the checklist has been uploaded. Please DO NOT include this**  
7 **checklist as part of the main manuscript document. It must be uploaded as a**  
8 **separate file.**  
9

10  
11  
12  
13  
14  
15  
16  
17  
18  
19  
20  
21  
22  
23  
24  
25  
26  
27  
28  
29  
30  
31  
32  
33  
34  
35  
36  
37  
38  
39  
40  
41  
42  
43  
44  
45  
46  
47  
48  
49  
50  
51  
52  
53  
54  
55  
56  
57  
58  
59  
60

For peer review only



# BMJ Open

## Attitudes and perceptions of health professionals towards management of hypothyroidism in general practice: a qualitative interview study

|                                 |                                                                                                                                                                                                                                                                                                                                                                                                                                                                                                                                                                                                                                                                                                                                           |
|---------------------------------|-------------------------------------------------------------------------------------------------------------------------------------------------------------------------------------------------------------------------------------------------------------------------------------------------------------------------------------------------------------------------------------------------------------------------------------------------------------------------------------------------------------------------------------------------------------------------------------------------------------------------------------------------------------------------------------------------------------------------------------------|
| Journal:                        | <i>BMJ Open</i>                                                                                                                                                                                                                                                                                                                                                                                                                                                                                                                                                                                                                                                                                                                           |
| Manuscript ID                   | bmjopen-2017-019970.R1                                                                                                                                                                                                                                                                                                                                                                                                                                                                                                                                                                                                                                                                                                                    |
| Article Type:                   | Research                                                                                                                                                                                                                                                                                                                                                                                                                                                                                                                                                                                                                                                                                                                                  |
| Date Submitted by the Author:   | 12-Dec-2017                                                                                                                                                                                                                                                                                                                                                                                                                                                                                                                                                                                                                                                                                                                               |
| Complete List of Authors:       | Dew, Rosie; University of Sunderland, Faculty of Health Sciences and Wellbeing<br>King, Kathryn; University of Sunderland, Faculty of Health Sciences and Wellbeing<br>Okosieme, Onyebuchi; Prince Charles Hospital<br>Pearce, Simon; Newcastle University, Institute of Genetic Medicine<br>Donovan, Gemma; University of Sunderland, Faculty of Health Sciences and Wellbeing<br>Taylor, Peter ; Cardiff University, School of Medicine<br>Hickey, Janis; British Thyroid Foundation<br>Dayan, Colin; Cardiff University, School of Medicine<br>Leese, Graham; University of Dundee, School of Medicine<br>Razvi, Salman; Queen Elizabeth Hospital<br>Wilkes, Scott; University of Sunderland, Faculty of Health Sciences and Wellbeing |
| <b>Primary Subject Heading</b>: | Diabetes and endocrinology                                                                                                                                                                                                                                                                                                                                                                                                                                                                                                                                                                                                                                                                                                                |
| Secondary Subject Heading:      | General practice / Family practice, Qualitative research                                                                                                                                                                                                                                                                                                                                                                                                                                                                                                                                                                                                                                                                                  |
| Keywords:                       | General practice, levothyroxine, hypothyroidism, TSH, behaviour, health professionals                                                                                                                                                                                                                                                                                                                                                                                                                                                                                                                                                                                                                                                     |
|                                 |                                                                                                                                                                                                                                                                                                                                                                                                                                                                                                                                                                                                                                                                                                                                           |

SCHOLARONE™  
Manuscripts

## Attitudes and perceptions of health professionals towards management of hypothyroidism in general practice: a qualitative interview study

### Authors

Rosie Dew<sup>1</sup>, Kathryn King<sup>1</sup>, Onyebuchi E Okosieme<sup>2</sup>, Simon Pearce<sup>3</sup>, Gemma Donovan<sup>1</sup>, Peter Taylor<sup>4</sup>, Janis Hickey<sup>5</sup>, Colin Dayan<sup>4</sup>, Graham Leese<sup>6</sup>, Salman Razvi<sup>7</sup>, Scott Wilkes<sup>1</sup>,

### Address for correspondence

Professor Scott Wilkes, Faculty of Health Sciences and Wellbeing, Sciences Complex, City Campus, Chester Road, University of Sunderland, SR1 3SD. Tel: 0191 515 2186 Fax: N/A  
Email: [Scott.wilkes@sunderland.ac.uk](mailto:Scott.wilkes@sunderland.ac.uk)

### Author affiliations

<sup>1</sup>Faculty of Health Sciences and Wellbeing, University of Sunderland, Sunderland, UK

<sup>2</sup>Prince Charles Hospital, Cardiff, UK

<sup>3</sup>Institute of Genetic Medicine, Newcastle University, Newcastle, UK

<sup>4</sup>Cardiff University School of Medicine, Cardiff University, Cardiff, UK

<sup>5</sup>British Thyroid Foundation, Harrogate, UK

<sup>6</sup>School of Medicine, University of Dundee, Dundee, UK

<sup>7</sup>Queen Elizabeth Hospital, Gateshead, UK

### Keywords

General practice, levothyroxine, hypothyroidism, TSH, health professionals, behaviour

**Word count (including quotes)** 4346

### ABSTRACT

#### *Objective*

To explore the attitudes and perceptions of health professionals towards management of hypothyroidism that contributes to the sub-optimal treatment of hypothyroidism in general practice.

#### *Design*

A qualitative interview study using semi-structured interviews.

#### *Participants*

Sixteen participants were interviewed between March and August 2016 comprising of nine general practitioners, four pharmacists, two practice nurses and one nurse practitioner

#### *Setting*

General practice and community pharmacies in the counties of Northumberland, Tyne and Wear, Stockton-on-Tees and North Cumbria, North of England, UK.

#### *Method*

A grounded theory approach was used to generate themes from interviews, which were underpinned by The Theory of Planned Behaviour to give explanation to the data.

#### *Results*

1  
2  
3 Although health professionals felt that hypothyroidism was easy to manage, GPs and nurses  
4 generally revealed inadequate knowledge of medication interactions and levothyroxine  
5 pharmacokinetics. Pharmacists felt limited in the advice that they provide to patients due to  
6 lack of access to patient records. Most GPs and nurses followed local guidelines, and relied  
7 on blood tests over clinical symptoms to adjust levothyroxine dose. The information  
8 exchanged between professional and patient was usually restricted by time and often  
9 centred on symptoms rather than patient education. Health professionals felt that incorrect  
10 levothyroxine adherence was the main reason behind sub-optimal treatment, although  
11 other factors such as co-morbidity and concomitant medication were mentioned. Enablers  
12 perceived by health professionals to improve the management of hypothyroidism included  
13 continuity of care, blood test reminders, system alerts for interfering medications and  
14 prescription renewal, and accessible blood tests and levothyroxine prescriptions for  
15 patients.

### 16 17 *Conclusion*

18  
19 There is a significant health professional behavioural component to the management of  
20 hypothyroidism. Addressing the differences in patient and professional knowledge and  
21 perceptions could reduce the barriers to optimal treatment, while continuity of care and  
22 increased involvement of pharmacists and practice nurses would help to promote optimal  
23 thyroid replacement.  
24  
25

### 26 27 **Strengths and Limitations of this study**

- 28  
29 • Sub-optimal treatment of hypothyroidism in general practice is common and  
30 behavioural approaches to treatment by health professionals involved in the  
31 management of patients with hypothyroidism warrants exploring.
- 32 • Confidential discussions with health professionals in this study allowed for a rich  
33 data of experiences, personal thoughts, and perceptions of the management of  
34 hypothyroidism to be collected.
- 35 • A known potential limitation of qualitative research is the influence the researchers  
36 may have had in the process of data gathering and analysis, causing bias. However,  
37 to help reduce this limitation the researcher who conducted the interviews did not  
38 have medical training, had not met the participants prior to the interviews or  
39 discussed the research with them.
- 40 • The small sample size of participants from the North of England may reduce the  
41 transferability of the findings of this study to other contexts.  
42  
43

### 44 45 **Collaborators**

46 Rosie Dew, PhD, Research Associate, University of Sunderland; Kathryn King, PhD Principal  
47 Lecturer in Nursing, University of Sunderland; Onyebuchi E Okosieme, MD, FRCP, Consultant  
48 Endocrinologist, Prince Charles Hospital, Cardiff; Simon Pearce, MD, FRCP, Professor of  
49 Endocrinology, Newcastle University; Gemma Donovan, MSc, Academic Pharmacist  
50 Practitioner, University of Sunderland; Peter Taylor, MSc Welsh Clinical Academic Trainee,  
51 Cardiff University School of Medicine; Janis Hickey, BA, Director, British Thyroid Foundation  
52 (BTF); Colin Dayan, PhD, FRCP, Professor of Clinical Diabetes and Metabolism, Cardiff  
53 University School of Medicine; Graham Leese, Consultant and Professor in Diabetes and  
54 Endocrinology, University of Dundee; Salman Razvi MD, FRCP, Consultant Endocrinologist  
55 and Senior Clinical Lecturer, Queen Elizabeth Hospital, Gateshead and Newcastle University;  
56  
57  
58  
59

1  
2  
3 Scott Wilkes, FRCGP PhD, Professor of General Practice and Primary Care, University of  
4 Sunderland.

5  
6 **Address for correspondence**

7  
8 Professor Scott Wilkes, Faculty of Health Sciences and Wellbeing, Sciences Complex, City  
9 Campus, Chester Road, University of Sunderland, SR1 3SD.

10  
11 **INTRODUCTION**

12  
13 Hypothyroidism is a common chronic disease caused by insufficient thyroid hormone  
14 production<sup>1-3</sup>. Levothyroxine, a synthetic isomer of the thyroid hormone thyroxine, is used to  
15 treat hypothyroidism and is dispensed to 99.7% of hypothyroid patients in England<sup>4</sup>. Dose  
16 increments are made following initiation of treatment to return serum thyroid stimulating  
17 hormone (TSH) levels into the reference range<sup>5</sup> and provide symptomatic relief<sup>6</sup>. Without  
18 correction, patients with abnormal thyroid results may have an increased risk of  
19 cardiovascular disease, dysrhythmias, fractures<sup>7</sup>, and are at risk of adverse effects on bone  
20 mass<sup>8</sup>, lipid metabolism<sup>9</sup>, blood pressure<sup>10</sup>, and cognitive function<sup>11 12</sup>. Even variation in  
21 thyroid function within the normal population reference range may also be associated with  
22 important differences in key health outcomes<sup>13 14</sup>. Furthermore, neglected hypothyroidism  
23 can result in life threatening myxoedema coma<sup>15</sup>. Patients with overt hypothyroidism may  
24 experience low energy levels, cold intolerance, aches and pains, weight gain, and changes in  
25 physical appearance.

26  
27  
28 The management of hypothyroidism is generally carried out in primary care and up till 2014  
29 GPs were required to maintain a register of hypothyroid patients as part of the Quality and  
30 Outcomes Framework. Hypothyroidism is considered a simple condition to manage<sup>16</sup> and  
31 levothyroxine is well tolerated by the majority of patients<sup>17</sup>. However, the therapeutic  
32 benefits of levothyroxine are sometimes unsatisfactory, and TSH levels higher than the  
33 reference range have been found in 11-27% of patients receiving thyroid replacement  
34 therapy, while the prevalence of low TSH levels has been reported to range from 20-41%<sup>7 18-</sup>  
35 <sup>21</sup>.

36  
37 Compliance<sup>22 23</sup>, pharmacogenomics associations<sup>24-28</sup> and interference from medication and  
38 comorbidities, such as autoimmune gastritis and coeliac disease<sup>23</sup>, have all been found to  
39 have an effect on thyroid therapy and it is likely that there are multifactorial reasons for sub-  
40 optimal treatment. However, only a limited number of studies to date have addressed  
41 potential solutions to sub-optimal thyroid hormone replacement in general practice. To  
42 address this problem, we previously explored the attitudes and perceptions of patients with  
43 hypothyroidism towards their treatment<sup>29</sup>. In the present study we have investigated the  
44 attitudes and perceptions towards the management of hypothyroidism amongst health  
45 professionals including GPs, nurse practitioners, pharmacists and practice nurses. We sought  
46 to determine the clinical management and behavioural factors that may influence the  
47 adequacy of thyroid hormone replacement in patients with hypothyroidism.

48  
49  
50  
51 **METHOD**

52  
53 *Design*

54  
55 Using a grounded theory approach<sup>30</sup>, qualitative interviews were performed with health  
56 professionals to explore their experiences, attitudes, and perceptions of the treatment of  
57  
58  
59

1  
2  
3 hypothyroidism. Interviews were conducted by the same researcher (RD) and an initial semi-  
4 structured topic guide was used (Box 1). Themes from initial interviews were explored and  
5 developed in subsequent interviews, and were mapped to the constructs of the Theory of  
6 Planned Behaviour (TPB) to give an overall explanation of the data. The TPB describes the  
7 association between an individual's beliefs and their behaviour by considering the influence  
8 of their attitude towards a particular behaviour, subjective norms and perceived behavioural  
9 control<sup>31</sup>.

### 10 11 *Setting*

12  
13 Health professionals from general practice and community pharmacies in the counties  
14 Northumberland, Tyne and Wear, Stockton-on-Tees and North Cumbria, North of England,  
15 were invited to take part. Interviews were conducted between March and August 2016.

### 16 17 *Participants*

18  
19 Sixteen one-off interviews were conducted with nine general practitioners (GP), four  
20 pharmacists (P), two practice nurses (N) and one nurse practitioner (NP). Participants were  
21 recruited through the NIHR Clinical Research Network: North East and North Cumbria and  
22 local professional networks via mail and email, and participants were given the option to  
23 contact the researcher if they wanted to take part. Most interviews were conducted face-to-  
24 face at the participant's place of work or the University of Sunderland. However, due to  
25 participant availability, one GP was interviewed at home, and one GP was interviewed by  
26 telephone. Only the participant and the researcher were present during the interviews, and  
27 the researcher had not met the participants previously. Most participants were not known  
28 to each other; however, three pharmacists had lecturing roles at the University of  
29 Sunderland and were known to each other.

30  
31 Confidentiality was assured, the process of the research explained and written consent was  
32 obtained prior to the interview. Interviews lasted approximately 45 minutes and  
33 interviewees were not paid for participation.

### 34 35 *Sampling*

36  
37 Using purposive sampling, participants were recruited from both rural and urban areas to  
38 provide an initial maximum variation sample<sup>30</sup>. To test emerging themes, theoretical  
39 sampling thereafter proceeded until data saturation was achieved and no new themes were  
40 forthcoming<sup>32</sup> in the following two interviews. Data gathered from the interview with the  
41 nurse practitioner was similar to that of the data obtained from the interviews with the  
42 practice nurses. Data saturation occurred quickly in the information provided by the  
43 interviews from our allied health professional group, thus more GPs were recruited than  
44 other health professionals.

### 45 46 *Analysis*

47  
48 Interviews were audio recorded and transcribed verbatim, and analysis was performed using  
49 Microsoft Word 2010. Open coding of transcripts preceded the categorisation of the data,  
50 and as the interviews progressed, themes emerging from the data were tested in  
51 subsequent interviews<sup>33</sup>. Notes made by RD after the interviews were considered during  
52 analysis. Data analysis occurred concurrently with the interviews, and constant comparison  
53 and iterative analysis of the interview data allowed for development and remodelling of  
54  
55  
56  
57  
58  
59  
60

1  
2  
3 themes until data saturation was achieved<sup>30</sup>. Coding was performed by RD and in-depth data  
4 analysis and negotiation of themes was conducted by RD, KK, and SW. Transcripts were  
5 returned to participants for comments and corrections; however, no feedback was received.  
6

## 7 **RESULTS**

8 Participant characteristics are shown in Table 1. Participant age ranged from 25-60 years,  
9 and four participants were male and twelve were female, with six participants working in  
10 rural areas and ten working in urban areas. The three main themes that emerged from the  
11 data were perceived health professional control, perceived health professional responsibility  
12 and attitudes to thyroid control, which were underpinned to the TPB as shown in Figure 1.  
13

### 14 *Perceived Health Professional Control*

#### 15 **Management of Hypothyroidism**

16 Generally health professionals found the management of hypothyroidism straightforward,  
17 relying on blood tests over non-specific clinical symptoms. However, there was uncertainty  
18 whether to start levothyroxine treatment in asymptomatic patients with borderline TSH  
19 levels, or patients with suggestive hypothyroid symptoms that did not have elevated TSH  
20 levels, or patients with suggestive hypothyroid symptoms that did not have elevated TSH  
21 levels:  
22

23  
24 *It's relatively commonly and easily managed. And the medication is generally quite*  
25 *palatable for patients. And they largely feel better. (GP-1)*  
26

27 *I think it's something that we often go into a bit of autopilot because we rely more*  
28 *on blood tests. (GP-6)*  
29

30 *Should you treat them or should you not? ...we'll just keep an eye on the blood test.*  
31 *The other side of the coin is that they get labelled and start having treatment for*  
32 *something when actually if you just left them alone they would have been fine. (GP-*  
33 *8)*  
34

35 Some health professionals recounted patients finding information on levothyroxine  
36 alternatives from online forums. Alternative treatments or referring to an endocrinologist  
37 was a last resort following the unsuccessful management of TSH with levothyroxine. Only a  
38 minority described alternatives including liothyronine (a synthetic form of triiodothyronine,  
39 T3), Armour Thyroid (desiccated porcine thyroid extract) and homeopathic alternatives.  
40 Health professionals had a tentative approach to levothyroxine alternatives, even with one  
41 example of a patient reporting feeling much better taking liothyronine, despite TSH and T3  
42 levels suggesting over-treatment:  
43

44  
45 *People research it and they'll come back and say, "I want the T3 because it's better."*  
46 *(GP-2)*  
47

48 *She is taking liothyronine... she had never felt better. But her TSH and her T3...*  
49 *suggest she's being over-treated. (NP)*  
50

#### 51 **Monitoring of Hypothyroidism**

52 Health professionals felt that blood test reminders and prescription renewal alerts were  
53 enablers of good thyroid management as were alerts to potentially interacting medication:  
54  
55  
56  
57  
58  
59  
60

1  
2  
3 *One of our admin team does a regular search and just finds out who's out of date*  
4 *with their blood tests. (GP-7)*  
5

6 *Because it's so good now, the computer system... Because it also alerts you if the*  
7 *doctors are prescribing something that interacts (N-2)*  
8  
9

### 10 **Access**

11 Easy access to blood tests and electronic prescriptions were perceived by GPs to help  
12 patients access their levothyroxine; however, concern was raised that patients in nursing  
13 homes might not be as tightly monitored:  
14

15 *Electronic prescriptions and things have been helpful... not having the money, I*  
16 *guess, to get the bus up to pick up a prescription... we can send prescriptions*  
17 *electronically to the chemist. (GP-4)*  
18

19 *We do have phlebotomy appointments in the evenings and weekends. (GP-7)*  
20  
21

### 22 **Continuity of Care**

23 Continuity of care was perceived by GPs to be important for the management of  
24 hypothyroid patients. Interpretation of normal thyroid function was difficult without  
25 matching patients' expectations, symptoms and blood tests results:  
26

27 *So continuity of care does make a difference to patients who are difficult to manage*  
28 *or where compliance is potentially a problem. Because if they start dotting all over*  
29 *the place, then you know you have to work that thread back up. And it's all about*  
30 *trust. A lot of it is about trust in the GP. And that comes from continuity of care.*  
31 *(GP-1)*  
32

33 *I think sometimes if blood test results are going back to a different [GP] than*  
34 *normally sees the patient, then it may just say "normal". And there's a risk that you*  
35 *would just say normal. (GP-7)*  
36

37 Pharmacists felt the advice they could give patients was limited by their lack of access to  
38 patient medical records, and that they could only advise depending on a patient's account of  
39 their TSH results and medications. Pharmacists felt that access to TSH results would save  
40 time and inaccuracies in advice they give:  
41

42 *And that's something that, you know, it would really help us if we had access to*  
43 *things like TSH results and things. Just as a second check, I think. (P-2)*  
44  
45

### 46 **Health Professional Knowledge**

47 GPs and nurses felt they would need to check which medications may interact with  
48 levothyroxine, and it was generally perceived that their knowledge of hypothyroidism  
49 pharmacokinetics could be increased. Most health professionals felt that the GP had overall  
50 responsibility for knowledge acquisition:  
51

52 *I mean, off the top of my head, I actually couldn't tell you any interactions between*  
53 *thyroxine... Apart from... I think it's iron. (GP-8)*  
54  
55  
56  
57  
58  
59  
60

*I suppose I haven't really taken the trouble to learn because I know that somebody else is doing it. (N-2)*

GPs and pharmacists generally perceived that patient knowledge of thyroid function was basic. Pharmacists mostly felt that patients were unaware of the risk of under or over treatment with levothyroxine:

*I don't think many of them can really tell you what it's for, what the thyroid does or what the risks are of going too high or too low. (P-1)*

### *Perceived Health Professional Responsibility*

#### **Provision of Information**

Generally health professionals provided verbal information about hypothyroidism and the importance of blood tests. Pharmacists described the need to avoid multivitamins, iron containing drugs, calcium containing drugs, indigestion remedies and coffee. Health professionals generally did not explain the effects of hypothyroidism on the thyroid:

*I'm not a leaflet person. I like to talk and tell them. And if I've got a visual aid, using the computer. I'll explain to that. (NP-1)*

*Best in the morning. Not to take it [levothyroxine] with anything else – certainly not a cup of coffee. (P-3)*

Generally, health professionals perceived that patients researched their own condition, or they would use leaflets from, or direct patients to patient.co.uk:

*These days I would generally tell people to look it up on the internet. And I would usually direct them to a website. These days, mainly patient.co.uk. (GP-9)*

*You know, they're quite happy, and they'll often do research themselves. (GP-1)*

#### **Use of Guidelines**

Local guidelines were used by the majority of GPs, although many were reliant upon the laboratory reference ranges. A few GPs felt that their management of hypothyroidism was not based on any guidelines:

*I think that's all in the TRAMP [Thyroid Regional Assessment and Management Plan, NHS North of Tyne and Gateshead Area Prescribing Committee, North of England] guidelines. I think I try to follow what I'm meant to do. (GP-4)*

*I think the idea is just to try and get the result sitting somewhere in that [laboratory reference range]. (GP-8)*

*You interpret the guidelines to treat the patient, not fitting the patient to the guideline. (GP-3)*

#### **Individualistic Approach**

Most GPs and nurses perceived that an individualistic approach was necessary for optimal thyroid hormone replacement for each patient. The general consensus was that GPs were



1  
2  
3 happy to increase levothyroxine doses to make patients feel better as long as TSH levels  
4 remained within range:

5  
6 *I aim to get them within range and feeling okay. (GP-9)*

7  
8 *I know there is evidence to suggest that you should keep them more to the*  
9 *suppressed end. If they're in the parameters, to me, they are controlled. (NP-1)*

### 10 11 **Overtreatment with Levothyroxine**

12 Health professionals described the difficulty of attributing symptoms to thyroid disease  
13 when a levothyroxine treated patient's TSH remains in range:

14  
15 *But my instinct is that if you say you're unwell and your thyroid blood tests are*  
16 *normal, I don't think you're unwell because of your thyroid problem. I would be... I*  
17 *would be very reluctant to give somebody extra thyroxine just in case. (GP-6)*

18  
19 GPs and nurses were conscious of the cardiac complications associated with giving a patient  
20 too much levothyroxine too quickly. Extra caution was described when treating the elderly  
21 where the risks of fractures may be high:

22  
23  
24 *You need to be careful that you don't suppress it too much, because that comes with*  
25 *some clinical risks around fractures – particularly in elderly patients. (GP-1)*

26  
27 Most GPs and the nurse practitioner were not prepared to over-treat patients with  
28 levothyroxine due to the associated risks. One GP recounted that she had intentionally over  
29 suppressed a patient's TSH level, explaining that she knew the patient well; the patient had a  
30 good knowledge of their condition, was aware of the risks of over suppression, and was  
31 miserable on a lower dose. However, another GP felt that some colleagues choose to ignore  
32 over suppression of TSH:

33  
34 *And if that little old lady then falls over or fractures... And sues you, because you've,*  
35 *you know, artificially suppressed her TSH. (GP-1)*

36  
37 *I felt that she was making an informed decision. She knew what the risks were.*  
38 *Especially as she got older... being over-treated. (GP-3)*

39  
40 *I've worked in a new practice, patients that have had TSH below 0.02 for a long time*  
41 *and they've just been told it's normal. (GP-5)*

### 42 43 44 **Reliability of Hypothyroid Symptoms**

45 Health professionals had a good knowledge of hypothyroid symptoms and felt that if they  
46 knew the patient then developing slowness and change in mood made them suspect  
47 hypothyroidism. GPs felt that the symptoms of hypothyroidism were nonspecific and  
48 overlapped with a number of clinical conditions. Moreover, health professionals perceived  
49 that patients often feel that their thyroid is accountable for many symptoms, particularly  
50 weight gain and tiredness:

51  
52 *So, you know, tiredness being one, weight gain being another, dry skin, intolerance*  
53 *to cold. But... Those are symptoms of lots of conditions, both physical health and*  
54 *mental health problems. (GP-1)*

1  
2  
3 *Once they've got a diagnosis of underactive thyroid, I think they blame it. (GP-2)*  
4  
5

#### 6 *Attitudes to Thyroid Control*

7

##### 8 **Responsibility**

9 Health professionals felt that it was the patient's responsibility to attend blood tests, for  
10 good medication adherence, and to challenge the GP if they were feeling symptomatic,  
11 however, it was perceived that the GP had overall responsibility:  
12

13 *I think it's in partnership. Because if the patient doesn't take the tablets, then you're*  
14 *not going to get control... and you don't check the blood tests and manage them*  
15 *appropriately, you're not going to get good control. (GP-3)*  
16

17 *Mainly the GP it's their GP, who's got the overall responsibility of looking after that*  
18 *patient. (NP-1)*  
19

##### 20 **Incorrect Levothyroxine Adherence as the Main Reason for Suboptimal Treatment**

21 Some health professionals in our study felt that avoiding weight gain encouraged  
22 levothyroxine adherence in patients. Health professionals believed that poor adherence was  
23 the main reason patients struggle to lower TSH levels. Additionally, the majority of health  
24 professionals said they had experienced a small proportion of patients who would take more  
25 levothyroxine than prescribed to alleviate tiredness or in an attempt to lose weight:  
26  
27

28 *They think, oh, if I don't take it, I'll put even more weight on. So I think there is a lot*  
29 *of that going on. (N-2)*  
30

31 *Certainly one patient I can remember who had said he had been feeling tired and*  
32 *have been taking an extra tablet. (P-1)*  
33

34 *... likes to run his TSH low. And there is no arguing with him, because he will just take*  
35 *what he wants to take. He'll come in and lie. (GP-8)*  
36  
37

##### 38 **The Priority of Hypothyroidism**

39 Health professionals believed patients may not prioritise hypothyroidism over health  
40 conditions such as heart disease, diabetes, hypertension and hypercholesterolaemia, and  
41 hypothyroidism was not a routine focus of medication reviews. Removal of hypothyroidism  
42 from the Quality and Outcome Framework (QOF) targets led to suspicions of reduced control  
43 and monitoring in some practices:  
44

45 *People who are on Dosette trays... they're more concerned about the other*  
46 *conditions that they have. (P-3)*  
47

48 *There's certain drugs that we get, sort of, payment for sitting down with patients*  
49 *and really going through how they work and how they should be taken. (P-2)*  
50

51 *And it used to be a QOF target that each year they had to have an annual TSH, which*  
52 *was a very easy target to hit. And then it stopped about two years ago. So I think*  
53 *some practices, potentially, have sort of let their thyroid management drop. (GP-2)*  
54  
55

### Time Restrictions

GPs and pharmacists felt that lack of time limited the information exchanged when speaking to a patient. One pharmacist felt there was pressure to focus on medication reviews, reducing the time available to give advice to other patients:

*You're always short of time. It's always a problem. (GP-7)*

*They encourage us to do new services, such as medication use reviews and new medicine service reviews in pharmacies. We don't necessarily have as much time as we would like to stand on the counter and talk to patients (P-1)*

Concern over prioritising the busy GP workload was articulated, with thyroid function tests potentially accepted as being normal when they may not be:

*And we've got an awful lot on our plates – using that old excuse again. But we're really, really busy. And... Sometimes the blood results come through and you're just like, well, actually they might have missed it for the last few days or whatever. And just bounce it through, you know. And then the patient... It's on the patient's head to ring up for their results and check that their levels are okay. (GP-8)*

### Factors that Interact with Treatment for Hypothyroidism

GPs and pharmacists felt that if patients had an elevated TSH but reported that they were compliant then it may be due to other medication affecting the absorption of levothyroxine. Health professionals also felt that stress, diet, alcohol, coffee, smoking, having a busy lifestyle, co-morbidities, other medications, mental health, learning disabilities, deafness and dementia could all have an effect on optimal thyroid hormone replacement:

*So I guess when it's [TSH] too high it's usually like what I said before – are you taking your medication at all? Are there other reasons why it might be that you're not absorbing it? Like the medication? Other conditions? (GP-4)*

*And I don't think people had realised for many years, is the caffeine thing. And that's the kind of thing that could come out in an MUR [medicine use review]. So are they drinking it with a cup of coffee in a morning? And calcium supplements as well. (P-3)*

### Discussion

#### Principal Findings

Regarding perceived professional control, health professionals felt that hypothyroidism was an easy condition to manage, and felt they relied on blood tests over non-specific clinical symptoms to confirm a diagnosis. However, health professionals generally perceived they had a lack of in-depth knowledge of medication interaction. On the other hand pharmacists felt they could provide limited advice due to their lack of access to patient data and lack of time. Enablers perceived by health professionals to improve the management of hypothyroidism included continuity of care, reminders for blood tests, system alerts for medication interactions and prescription renewal, and easy access to blood tests and levothyroxine prescriptions for patients.

In terms of perceived professional responsibility, most GPs and the nurse practitioner followed local guidelines for the management of hypothyroidism, and would only increase

1  
2  
3 the levothyroxine dose to improve symptom control as long as TSH levels remained within  
4 range. However, one GP recounted over suppressing a patient at the patient's request. The  
5 information exchanged between health professional and patient was limited by time  
6 restrictions, with most GPs and nurses assuming that patients would research their  
7 condition online. Written information leaflets were rarely provided to patients.  
8

9 Attitudes to thyroid control included perceiving hypothyroidism as less serious and more  
10 straightforward than other health conditions and that taking too much or too little  
11 levothyroxine was the main reason for inadequate thyroid control. However, interfering  
12 factors such as stress, other conditions and concomitant medication were acknowledged.  
13 GPs felt they were mainly responsible for a patient's treatment, but stressed that good  
14 medication adherence by patients was important for optimal treatment.  
15

16 Health professionals will usually strive to hold all attitudes, beliefs and behaviours in  
17 harmony<sup>34</sup>. However, this study has highlighted the cognitive dissonance between attitudes  
18 and beliefs versus behaviours that exist.  
19

### 20 *Comparisons with existing literature*

21  
22 Similar to the findings of our study, the management of hypothyroidism has been reported  
23 to be straightforward<sup>16</sup>. Like the GPs in our study, continuity of care was described by GPs in  
24 a previous qualitative study to enable them to provide higher quality of care in general  
25 practice due to the personal relationships that had formed<sup>35</sup>. However, health professionals  
26 generally felt they had incomplete knowledge of hypothyroidism, which was also found for  
27 other diseases such as gout<sup>36</sup> and dementia<sup>37</sup>. Access to patients medical records suggested  
28 by the pharmacists in this study has also been recommended to improve care and patient  
29 safety within Britain by the Royal Pharmaceutical Society<sup>38</sup>. Including pharmacists in health  
30 care teams has been shown to reduce hospital admissions and medical costs of patients  
31 aged 80 years of age or older in Sweden<sup>39</sup>, and pharmacist involvement has also been  
32 associated with lower rates of adverse drug events<sup>40</sup>.  
33  
34

35 Deliberate TSH suppression (<0.1 mU/L) with high doses of levothyroxine, which was  
36 avoided by the majority of GPs in our study, is not recommended due to the potential risk of  
37 heart disease, stroke, osteoporosis and fractures<sup>41</sup>. In our previously published work with  
38 hypothyroid patients, patients felt that health professionals were more inclined to treat  
39 their TSH levels than their symptoms and that they were not given very much information at  
40 the time of diagnosis<sup>29</sup>, as reported by some health professionals in this study.  
41  
42

43 Time was a barrier to thyroid management identified by health professionals in our study,  
44 and is a well-documented limitation in primary care<sup>42 43</sup>. However, previous studies have  
45 shown that although time is a limitation in terms of the information exchanged, it is  
46 consultation quality rather than the length of appointment that is more impactful<sup>43</sup>. Poor  
47 levothyroxine adherence, medication interactions and co-morbidities have been reported to  
48 have an effect on thyroid replacement therapy<sup>44</sup>, which were some of the barriers reported  
49 in this study. However, in our qualitative interview study with hypothyroid patients,  
50 although not generalisable outside of the patient population, good levothyroxine adherence  
51 was reported by nearly all patients, even those who had TSH levels outside of the reference  
52 range<sup>29</sup>, suggesting that the reasons for inadequate thyroid treatment may lie deeper than  
53 the typical assumptions by health professionals that poor adherence is the main reason for  
54 suboptimal treatment<sup>22 23</sup>.  
55  
56  
57  
58  
59  
60

### *Strengths and weaknesses*

Due to time restrictions of this research project, this study did not have the opportunity to be pilot tested, which may have affected how the interviews progressed. Moreover, no feedback on the transcripts was provided by participants; feedback may have contributed to enriching the data further. Open coding was performed by RD, however, negotiation of categories and themes were conducted by RD, KK and SW to help reduce this limitation.

Since our sample only included four pharmacists and three nurses the evidence presented from these groups may lack validity and generalisability outside of this small sample size. Moreover, a different sample of participants with different levels of experience may have provided different results, particularly pharmacists with more years of experience, and also from rural areas. Additionally, within our GP sample it was unknown whether those that took part in our study were more likely to follow guidelines and regularly review patients, thus being less likely to have higher numbers of thyroxine treated patients with abnormal TSH than those who did not take part in our study. However, although this study was conducted with a sample of sixteen participants in the North of England, and may not be generally applicable, the findings are transferrable within this professional population, and this study provides novel insights into the attitudes, experiences and behaviour of health professionals involved in the management of hypothyroidism.

### *Implications for future research and clinical practice*

To help increase perceived health professional control in the future, quantifying the extent that clinical, behavioural and pharmacogenomic associations may affect levothyroxine therapy and providing this information to health professionals involved in management of hypothyroidism may improve management and therefore treatment for this group of patients. However, it should be considered that health professionals in general practice have limited time and specialism. Moreover, increasing the involvement of pharmacists or practice nurses in the management of hypothyroidism may improve their perceived control and help relieve the pressure on GPs, and may also increase continuity of care, for example through pharmacist led medication reviews or specific chronic disease management clinics for this cohort of patients.

To reinforce perceived health professional responsibility, consistent provision of patient information leaflets and discussions about hypothyroidism would help increase patient understanding and this type of information can be exchanged in a short period of time, and may reduce the time pressures on GPs if patients are more informed. Finally, clarity on the timing of initiation of treatment in asymptomatic patients with slightly elevated TSH, and an age specific and symptom focus where appropriate may help to improve the management of hypothyroid patients within general practice.

### **Funding body**

This work was supported by Amdipharm Mercury Company Limited (RT/6702). The funder has had no influence in the design, analysis or production of this manuscript. All researchers involved in the production of this paper are independent from the funder.

### **Ethical approval**

Ethical approval was granted from NRES Committee West Midlands - South Birmingham REC (REC reference 15/WM/0345) with SSA approval from Northumberland, Gateshead, and South Tyneside Local Research Ethics Committees. Approval was also granted from the University of Sunderland Research Ethics Committee.

### Competing interests

The authors have stated that there are none

### Contribution

SW designed the study. RD was responsible for the recruitment and interviewing of participants. RD gained qualitative research skills through attendance at a qualitative interview training course at Newcastle University, and from working on previous research projects. RD, SW and KK were involved in the in-depth data analysis and development of themes that emerged from the data. RD wrote the first draft of this paper. OO, SP, GD, PT, JH, CD, GL and SR were involved in the overall explanation of the data and revision of the final manuscript.

### Data sharing

No additional data are available

### Acknowledgements

The authors would like to acknowledge University of Sunderland for sponsoring this study. Thank you to Shona Haining, Claire Graham and Sally Dunn, supported by the NIHR Clinical Research Network: North East and North Cumbria, working for North of England Commissioning Support unit (NECS), for their efficient and effective assistance during recruitment of participants. Finally, many thanks to all the health professionals that volunteered to be interviewed in our study.

### References

1. Tunbridge WM, Evered DC, Hall R, Appleton D, Brewis M, Clark F, et al. The spectrum of thyroid disease in a community: the Whickham survey. *Clin Endocrinol (Oxf)* 1977;7(6):481-93.
2. Vanderpump MPJ. The Epidemiology of Thyroid Diseases. In: Werner SC, Ingbar SH, Braverman LE, Utiger RD, editors. *Werner & Ingbar's the Thyroid: A Fundamental and Clinical Text, Volume 549*. Philadelphia, USA: Lippincott Williams & Wilkins, 2005:398-406.
3. Chaker L, Bianco AC, Jonklaas J, Peeters RP. Hypothyroidism. *Lancet* 2017;390(10101):1550-62.
4. Health and Social Care Information Centre (HSCIC). Prescriptions Dispensed in the Community England 2005-2015, 2016.
5. Beastall GH, Beckett GJ, Franklyn J, D. FW, Hickey J, John R, et al. UK Guidelines for the Use of Thyroid Function Tests. The Association for Clinical Biochemistry, British Thyroid Association, British Thyroid Foundation. 2006.
6. Vanderpump MPJ, Ahlquist JAO, Franklyn JA, Clayton RN. Consensus statement for good practice and audit measures in the management of hypothyroidism and hyperthyroidism. *BMJ* 1996;313:539 - 44.

- 1
- 2
- 3 7. Flynn RW, Bonellie SR, Jung RT, MacDonald TM, Morris AD, Leese GP. Serum
- 4 thyroid-stimulating hormone concentration and morbidity from cardiovascular
- 5 disease and fractures in patients on long-term thyroxine therapy. *J Clin*
- 6 *Endocrinol Metab* 2010;95(1):186-93.
- 7
- 8 8. Uzzan B, Campos J, Cucherat M, Nony P, Boissel JP, Perret GY. Effects on bone
- 9 mass of long term treatment with thyroid hormones: a meta-analysis. *J Clin*
- 10 *Endocrinol Metab* 2011;81(12):4278-89.
- 11
- 12 9. Duntas LH. Thyroid disease and lipids. *Thyroid* 2002;12(4):287-93.
- 13
- 14 10. Fommei E, Iervasi G. The role of thyroid hormone in blood pressure homeostasis:
- 15 evidence from short-term hypothyroidism in humans. *J Clin Endocrinol Metab*
- 16 2002;87(5):1996-2000.
- 17
- 18 11. Juarez-Cedillo T, Basurto-Acevedo L, Vega-Garcia S, Martha ASR, Retana-
- 19 Ugalde R, Juarez-Cedillo E, et al. Prevalence of thyroid dysfunction and its
- 20 impact on cognition in older mexican adults: (SADEM study). *J Endocrinol*
- 21 *Invest* 2017;40(9):945-52
- 22
- 23 12. McMillan C, Bradley C, Razvi S, Weaver J. Evaluation of new measures of the
- 24 impact of hypothyroidism on quality of life and symptoms: the ThyDQoL and
- 25 ThySRQ. *Value Health* 2008;11(2):285-94.
- 26
- 27 13. Dayan CM, Saravanan P, Bayly G. Whose normal thyroid function is better—
- 28 yours or mine? *Lancet* 2002;360(9330):353-54.
- 29
- 30 14. Taylor PN, Razvi S, Pearce SH, Dayan CM. A Review of the Clinical
- 31 Consequences of Variation in Thyroid Function Within the Reference Range.
- 32 *J Clin Endocrinol Metab* 2013;98(9):3562-71.
- 33
- 34 15. Fliers E, Wiersinga WM. Myxedema coma. *Rev Endocr Metab Disord*
- 35 2003;4:137-41.
- 36
- 37 16. Vaidya B, Pearce SH. Management of hypothyroidism in adults. *BMJ*
- 38 2008;337:a801.
- 39
- 40 17. Biondi B, Wartofsky L. Combination treatment with T4 and T3: toward
- 41 personalized replacement therapy in hypothyroidism? *J Clin Endocrinol*
- 42 *Metab* 2012;97(7):2256-71.
- 43
- 44 18. Somwaru LL, Arnold AM, Joshi N, Fried LP, Cappola AR. High frequency of and
- 45 factors associated with thyroid hormone over-replacement and under-
- 46 replacement in men and women aged 65 and over. *J Clin Endocrinol Metab*
- 47 2009;94(4):1342-45.
- 48
- 49 19. Okosieme OE, Belludi G, Spittle K, Kadiyala R, Richards J. Adequacy of thyroid
- 50 hormone replacement in a general population. *Qjm* 2011;104(5):395-401.
- 51
- 52 20. Parle JV, Franklyn JA, Cross KW, Jones SR, Sheppard MC. Thyroxine
- 53 prescription in the community: serum thyroid stimulating hormone level
- 54 assays as an indicator of undertreatment or overtreatment. *Br J Gen Pract*
- 55 1993;43(368):107-09.
- 56
- 57 21. Taylor PN, Iqbal A, Minassian C, Sayers A, Draman MS, Greenwood R, et al.
- 58 Falling threshold for treatment of borderline elevated thyrotropin levels-
- 59 balancing benefits and risks: evidence from a large community-based study.
- 60 *JAMA Intern Med* 2014;174(1):32-39.
22. Briesacher BA, Andrade SE, Fouayzi H, Chan KA. Comparison of drug
- adherence rates among patients with seven different medical conditions.
- Pharmacother* 2008;28(4):437-43.
23. Robertson HMA, Narayanaswamy AKP, Pereira O, Copland SA, Herriot R,
- McKinlay AW, et al. Factors Contributing to High Dose Levothyroxine Doses

- in Primary Hypothyroidism: An Interventional Audit of a Large Community Database. *Thyroid* 2014;24(12):1765-71.
24. Andersen S, Pedersen KM, Bruun NH, Laurberg P. Narrow individual variations in serum T(4) and T(3) in normal subjects: a clue to the understanding of subclinical thyroid disease. *J Clin Endocrinol Metab* 2002;87(3):1068-72.
  25. van der Deure WM, Friesema EC, de Jong FJ, de Rijke YB, de Jong FH, Uitterlinden AG, et al. Organic anion transporter 1B1: an important factor in hepatic thyroid hormone and estrogen transport and metabolism. *Endocrinol* 2008;149(9):4695-701.
  26. Torlontano M, Durante C, Torrente I, Crocetti U, Augello G, Ronga G, et al. Type 2 Deiodinase Polymorphism (Threonine 92 Alanine) Predicts l-Thyroxine Dose to Achieve Target Thyrotropin Levels in Thyroidectomized Patients. *J Clin Endocrinol Metab* 2008;93(3):910-13.
  27. Taylor PN, Porcu E, Chew S, Campbell PJ, Traglia M, Brown SJ, et al. Whole-genome sequence-based analysis of thyroid function. *Nat Commun* 2015;6.
  28. Panicker V, Saravanan P, Vaidya B, Evans J, Hattersley AT, Frayling TM, et al. Common variation in the DIO2 gene predicts baseline psychological well-being and response to combination thyroxine plus triiodothyronine therapy in hypothyroid patients. *J Clin Endocrinol Metab* 2009;94(5):1623-29.
  29. Dew R, King K, Okosieme OE, Pearce S, Donovan G, Taylor PN, et al. Patients' Attitudes and Perceptions towards Treatment of Hypothyroidism in General Practice. *BJGP Open* 2017;1(2):BJGP-2017-0125.
  30. Strauss AL, Corbin JM. *Basics of qualitative research. Grounded theory procedures and techniques*. London: Sage Publications, 1990.
  31. Ajzen I. The theory of planned behavior. *Organ Behav Hum Decis Process* 1991;50(2):179-211.
  32. Glaser B, Strauss A. *The Discovery of Grounded Theory*. Chicago: Aldine, 1967.
  33. Denzin NK, Lincoln YS. *Handbook of Qualitative Research*. London: Sage Publications, 1994.
  34. Festinger L. *A Theory of Cognitive Dissonance*. California: Stanford University Press, 1957.
  35. Ridd M, Shaw A, Salisbury C. 'Two sides of the coin'—the value of personal continuity to GPs: a qualitative interview study. *Fam Pract* 2006;23(4):461-68.
  36. Spencer K, Carr A, Doherty M. Patient and provider barriers to effective management of gout in general practice: a qualitative study. *Ann Rheum Dis* 2012;71:1490-95.
  37. Pathak KP, Montgomery A. General practitioners' knowledge, practices, and obstacles in the diagnosis and management of dementia. *Aging Ment Health* 2015;19(10):912-20.
  38. Royal Pharmaceutical Society England. *Shaping Pharmacy for the Future. Pharmacist access to the patient health record*, 2014.
  39. Gillespie U, Alassaad A, Henrohn D, Garmo H, Hammarlund-Udenaes M, Toss H, et al. A Comprehensive Pharmacist Intervention to Reduce Morbidity in Patients 80 Years or Older A Randomized Controlled Trial. *Arch Intern Med* 2009;169(9):894-900.
  40. Schnipper JL, Kirwin JL, Cotugno MC, Wahlstrom SA, Brown BA, Tarvin E, et al. Role of Pharmacist Counseling in Preventing Adverse Drug Events After Hospitalization. *Arch Intern Med* 2006;166(5):565-71.



- 1  
2  
3 41. Okosieme O, Gilbert J, Abraham P, Boelaert K, Dayan C, Gurnell M, et al.  
4 Management of primary hypothyroidism: statement by the British Thyroid  
5 Association Executive Committee. *Clin Endocrinol (Oxf)* 2016;84(6):799-808.  
6 42. Albers-Heitner P, Berghmans B, Nieman F, Lagro-Janssen T, Winkens R.  
7 Adherence to professional guidelines for patients with urinary incontinence by  
8 general practitioners: a cross-sectional study. *J Eval Clin Pract*  
9 2008;14(5):807-11.  
10 43. Dugdale DC, Epstein R, Pantilat SZ. Time and the Patient–Physician  
11 Relationship. *J Gen Intern Med* 1999;14(S1):34-40.  
12 44. Okosieme OE. Thyroid hormone replacement: current status and challenges.  
13 *Expert Opin Pharmacother* 2011;12(15):2315-28.  
14  
15  
16  
17  
18  
19  
20  
21  
22  
23  
24  
25  
26  
27  
28  
29  
30  
31  
32  
33  
34  
35  
36  
37  
38  
39  
40  
41  
42  
43  
44  
45  
46  
47  
48  
49  
50  
51  
52  
53  
54  
55  
56  
57  
58  
59  
60

**Box 1. Initial Topic Guide for Interviews**

What is your role in the management of patients with hypothyroidism?

*Symptoms of hypothyroidism*

How would you describe your familiarity with the symptoms of hypothyroidism?

Are you confident to spot patients with hypothyroidism? Why? Example?

What makes you suspect hypothyroidism? Why? Example?

*Diagnosis*

How would you describe your confidence in making a diagnosis of hypothyroidism?

*Referral*

Do you refer patients who have abnormal thyroid function tests? Can you describe the process?

Do you refer patients to get a diagnosis of hypothyroidism?

Who do you refer to? Can you describe the process?

*Management*

What do you think about the management of hypothyroidism in general practice? Are you happy to manage hypothyroidism in general practice?

How often do you check thyroid function tests?

Does this differ for controlled/out of control patients?

Are there any instances when you would refer/seek help? Example?

How do you manage patients who complain of symptoms and the TSH is in the normal range? Example? Or would in theory? What are your thoughts on this?

Do you find it difficult to keep the TSH in the reference range?

What do you think about changing levothyroxine dose for patients? Do you think the increments of 25mcg of levothyroxine too great?

What are your thoughts about hypothyroid patients who are out of control? Are you concerned about hypothyroid patients who are out of control?

What are your thoughts on patients with:

High TSH (usually indicating too little levothyroxine)?

Low TSH (usually indicating too much levothyroxine)?

How do you manage patients who insist on taking more levothyroxine than their TSH suggests (i.e. over-suppressed)?

What do you think about patients who have high TSH blood tests which suggests that they are not taking enough levothyroxine? Have you experienced this?

What are the main influences that you see that contribute to patients struggling to control their hypothyroidism?

Can you predict which patients will struggle to control their hypothyroidism? Example?

**Table 1 Participant Characteristics**

| Job Role                    | Location | Age | Gender | Years Qualified |
|-----------------------------|----------|-----|--------|-----------------|
| <b>General Practitioner</b> |          |     |        |                 |
| GP-1                        | Urban    | 45  | Female | 10              |
| GP-2                        | Rural    | 40  | Male   | 14              |
| GP-3                        | Urban    | 59  | Female | 36              |
| GP-4                        | Urban    | 36  | Female | 10              |
| GP-5                        | Urban    | 39  | Female | 16              |
| GP-6                        | Urban    | 51  | Male   | 27              |
| GP-7                        | Rural    | 52  | Female | 29              |
| GP-8                        | Rural    | 39  | Female | 14              |
| GP-9                        | Rural    | 48  | Male   | 20              |
| <b>Nurse practitioner</b>   |          |     |        |                 |
| NP-1                        | Rural    | 55  | Female | 35              |
| <b>Practice Nurse</b>       |          |     |        |                 |
| N-1                         | Urban    | 58  | Female | 40              |
| N-2                         | Rural    | 60  | Female | 40              |
| <b>Community Pharmacist</b> |          |     |        |                 |
| P-1                         | Urban    | 30  | Male   | 8               |
| P-2                         | Urban    | 29  | Female | 6               |
| P-3                         | Urban    | 39  | Female | 15              |
| P-4                         | Urban    | 25  | Female | 2               |

**Figure 1 Concept diagram showing the attitudes and perceptions of health professionals towards management of hypothyroidism in general practice**

1  
2  
3  
4  
5  
6  
7  
8  
9  
10  
11  
12  
13  
14  
15  
16  
17  
18  
19  
20  
21  
22  
23  
24  
25  
26  
27  
28  
29  
30  
31  
32  
33  
34  
35  
36  
37  
38  
39  
40  
41  
42  
43  
44  
45  
46  
47  
48  
49  
50  
51  
52  
53  
54  
55  
56  
57  
58  
59  
60

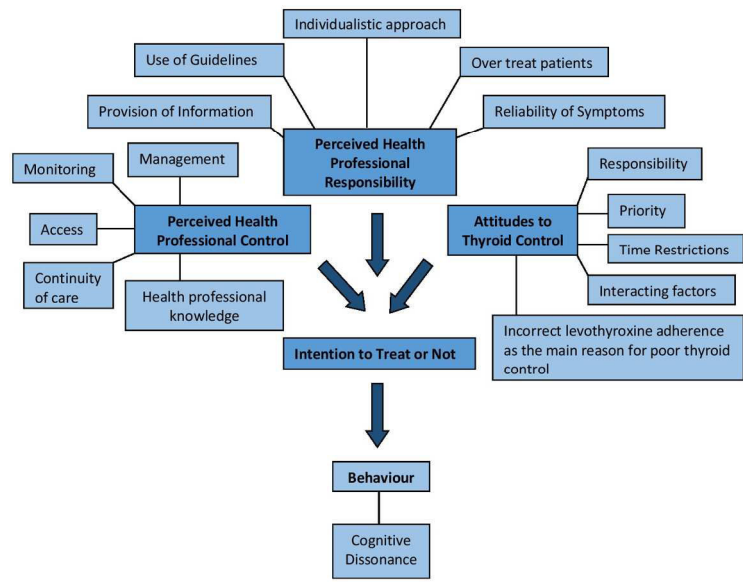

1

Figure 1 Concept diagram showing the attitudes and perceptions of health professionals towards management of hypothyroidism in general practice

140x198mm (300 x 300 DPI)

## Consolidated criteria for reporting qualitative studies (COREQ): 32-item checklist

Developed from:

Tong A, Sainsbury P, Craig J. Consolidated criteria for reporting qualitative research (COREQ): a 32-item checklist for interviews and focus groups. *International Journal for Quality in Health Care*. 2007. Volume 19, Number 6: pp. 349 – 357

**YOU MUST PROVIDE A RESPONSE FOR ALL ITEMS. ENTER N/A IF NOT APPLICABLE**

| No. Item                                       | Guide questions/description                                                                                                                              | Reported on Page #        |
|------------------------------------------------|----------------------------------------------------------------------------------------------------------------------------------------------------------|---------------------------|
| <b>Domain 1: Research team and reflexivity</b> |                                                                                                                                                          |                           |
| <i>Personal Characteristics</i>                |                                                                                                                                                          |                           |
| 1. Interviewer/facilitator                     | Which author/s conducted the interview or focus group?                                                                                                   | Methods                   |
| 2. Credentials                                 | What were the researcher's credentials?<br>E.g. PhD, MD                                                                                                  | Collaborators             |
| 3. Occupation                                  | What was their occupation at the time of the study?                                                                                                      | Collaborators             |
| 4. Gender                                      | Was the researcher male or female?                                                                                                                       | N/A                       |
| 5. Experience and training                     | What experience or training did the researcher have?                                                                                                     | Contribution              |
| <i>Relationship with participants</i>          |                                                                                                                                                          |                           |
| 6. Relationship established                    | Was a relationship established prior to study commencement?                                                                                              | Methods                   |
| 7. Participant knowledge of the interviewer    | What did the participants know about the researcher? e.g. personal goals, reasons for doing the research                                                 | Strengths and Limitations |
| 8. Interviewer characteristics                 | What characteristics were reported about the interviewer/facilitator? e.g. Bias, assumptions, reasons and interests in the research topic                | Strengths and Limitations |
| <b>Domain 2: study design</b>                  |                                                                                                                                                          |                           |
| <i>Theoretical framework</i>                   |                                                                                                                                                          |                           |
| 9. Methodological orientation and Theory       | What methodological orientation was stated to underpin the study? e.g. grounded theory, discourse analysis, ethnography, phenomenology, content analysis | Methods                   |
| <i>Participant selection</i>                   |                                                                                                                                                          |                           |
| 10. Sampling                                   | How were participants selected? e.g. purposive, convenience, consecutive, snowball                                                                       | Methods                   |
| 11. Method of approach                         | How were participants approached? e.g. face-to-face, telephone, mail, email                                                                              | Methods                   |
| 12. Sample size                                | How many participants were in the study?                                                                                                                 | Methods                   |

|                                        |                                                                                                                                 |                                       |
|----------------------------------------|---------------------------------------------------------------------------------------------------------------------------------|---------------------------------------|
| 13. Non-participation                  | How many people refused to participate or dropped out? Reasons?                                                                 | N/A                                   |
| <i>Setting</i>                         |                                                                                                                                 |                                       |
| 14. Setting of data collection         | Where was the data collected? e.g. home, clinic, workplace                                                                      | Methods                               |
| 15. Presence of non-participants       | Was anyone else present besides the participants and researchers?                                                               | Methods                               |
| 16. Description of sample              | What are the important characteristics of the sample? e.g. demographic data, date                                               | Methods                               |
| <i>Data collection</i>                 |                                                                                                                                 |                                       |
| 17. Interview guide                    | Were questions, prompts, guides provided by the authors? Was it pilot tested?                                                   | Methods and Strengths and Limitations |
| 18. Repeat interviews                  | Were repeat inter views carried out? If yes, how many?                                                                          | Methods                               |
| 19. Audio/visual recording             | Did the research use audio or visual recording to collect the data?                                                             | Methods                               |
| 20. Field notes                        | Were field notes made during and/or after the inter view or focus group?                                                        | Methods                               |
| 21. Duration                           | What was the duration of the inter views or focus group?                                                                        | Methods                               |
| 22. Data saturation                    | Was data saturation discussed?                                                                                                  | Methods                               |
| 23. Transcripts returned               | Were transcripts returned to participants for comment and/or correction?                                                        | Methods                               |
| <b>Domain 3: analysis and findings</b> |                                                                                                                                 |                                       |
| <i>Data analysis</i>                   |                                                                                                                                 |                                       |
| 24. Number of data coders              | How many data coders coded the data?                                                                                            | Methods                               |
| 25. Description of the coding tree     | Did authors provide a description of the coding tree?                                                                           | Methods                               |
| 26. Derivation of themes               | Were themes identified in advance or derived from the data?                                                                     | Methods                               |
| 27. Software                           | What software, if applicable, was used to manage the data?                                                                      | Methods                               |
| 28. Participant checking               | Did participants provide feedback on the findings?                                                                              | Methods + Strengths and limitations   |
| <i>Reporting</i>                       |                                                                                                                                 |                                       |
| 29. Quotations presented               | Were participant quotations presented to illustrate the themes/findings? Was each quotation identified? e.g. participant number | Results                               |
| 30. Data and findings consistent       | Was there consistency between the data presented and the findings?                                                              | Results                               |
| 31. Clarity of major themes            | Were major themes clearly presented in the findings?                                                                            | Results                               |
| 32. Clarity of minor themes            | Is there a description of diverse cases or discussion of minor themes?                                                          | Results                               |

1  
2  
3 **Once you have completed this checklist, please save a copy and upload it as part**  
4 **of your submission. When requested to do so as part of the upload process,**  
5 **please select the file type: *Checklist*. You will NOT be able to proceed with**  
6 **submission unless the checklist has been uploaded. Please DO NOT include this**  
7 **checklist as part of the main manuscript document. It must be uploaded as a**  
8 **separate file.**  
9

10  
11  
12  
13  
14  
15  
16  
17  
18  
19  
20  
21  
22  
23  
24  
25  
26  
27  
28  
29  
30  
31  
32  
33  
34  
35  
36  
37  
38  
39  
40  
41  
42  
43  
44  
45  
46  
47  
48  
49  
50  
51  
52  
53  
54  
55  
56  
57  
58  
59  
60

For peer review only
